## Value-based genomics

Jun Gong<sup>1</sup>, Kathy Pan<sup>2</sup>, Marwan Fakh<sup>1</sup>, Sumanta Pal<sup>1</sup> and Ravi Salgia<sup>3</sup>

<sup>1</sup>Department of Medical Oncology, City of Hope National Medical Center, Duarte, CA, USA

<sup>2</sup>Los Angeles Biomedical Research Institute at Harbor-UCLA Medical Center, Torrance, CA, USA

<sup>3</sup>Medical Oncology and Experimental Therapeutics, City of Hope Comprehensive Cancer Center, Duarte, CA, USA

**Correspondence to:** Ravi Salgia, **email:** rsalgia@coh.org

**Keywords:** next-generation sequencing; precision oncology; pathways; cost-effectiveness; value-based care

**Received:** November 30, 2017 **Accepted:** January 19, 2018 **Epub:** January 30, 2018 **Published:** March 20, 2018

**Copyright:** Gong et al. This is an open-access article distributed under the terms of the Creative Commons Attribution License 3.0 (CC BY 3.0), which permits unrestricted use, distribution, and reproduction in any medium, provided the original author and source are credited.

### ABSTRACT

**Advancements in next-generation sequencing have greatly enhanced the development of biomarker-driven cancer therapies. The affordability and availability of next-generation sequencers have allowed for the commercialization of next-generation sequencing platforms that have found widespread use for clinical-decision making and research purposes. Despite the greater availability of tumor molecular profiling by next-generation sequencing at our doorsteps, the achievement of value-based care, or improving patient outcomes while reducing overall costs or risks, in the era of precision oncology remains a looming challenge. In this review, we highlight available data through a pre-established and conceptualized framework for evaluating value-based medicine to assess the cost (efficiency), clinical benefit (effectiveness), and toxicity (safety) of genomic profiling in cancer care. We also provide perspectives on future directions of next-generation sequencing from targeted panels to whole-exome or whole-genome sequencing and describe potential strategies needed to attain value-based genomics.**

### INTRODUCTION

Although often interchanged with personalized medicine, the term precision medicine was first given prominence by the National Research Council with the intention to convey a broader concept that although treatments were rarely developed for individuals, subgroups of patients could be defined and targeted by genomics [1]. The concept of precision medicine in oncology further rose to popularity with the launching of the Precision Medicine Initiative aimed to accelerate development of therapeutic strategies that are biomarker-driven [2].

Over the past several decades, many major advances in cancer treatment have already been attributed, in part, to precision medicine or biomarker-driven treatment. Perhaps one of the earliest examples of biomarker-driven therapy was the development of tamoxifen in the adjuvant treatment of hormone-receptor positive breast cancer [3–5]. The approval of the break point cluster (BCR)-Abelson (ABL) tyrosine-kinase inhibitor (TKI) imatinib for chronic myelogenous leukemia (CML) in 2001 heralded the era

of targeted therapy [6–8]. More recently, several clinical trials in oncology have launched to match targeted therapy to genomic profiling including the Signature, I-SPY, National Cancer Institute (NCI)-sponsored NCI-MATCH, NCI-MPACT, ALCHEMIST, Lung-MAP, Pediatric MATCH, and Exceptional Responders, Lung Cancer Mutation Consortium (LCMC)-sponsored, and American Society of Clinical Oncology (ASCO)-sponsored TAPUR trials [9–17]. In the United Kingdom, Innovate UK has recently launched an initiative to support €6 million in the development of precision medicine technologies that can lead to the improvement in targeted therapies [18].

Paramount to the advancement of precision oncology, the development of next-generation sequencing (NGS) techniques with high-throughput functionality has enabled the massive parallel sequencing of genomes at unprecedented rates [19]. With the ability to rapidly and efficiently perform genomic sequencing, many Clinical Laboratory Improvement Amendments (CLIA)-certified commercial and academic laboratories have developed validated NGS platforms with targeted panels that are increasingly being incorporated into

clinical-decision making and cancer research [20]. However, total costs of cancer care are rapidly increasing, of which only 5–20% are accounted by cancer drugs, and are projected to increase in the U.S. from 125 billion dollars in 2010 to 158 billion dollars in 2020 [21]. Furthermore, costs of cancer care including copayments, out-of-pocket expenses, and insurance premiums often exceed patients' expectations and impose significant financial stress and burden that can adversely affect quality of life (QOL) and outcomes [21, 22].

In the era of precision oncology, improving patient outcomes while reducing overall costs or risks with the incorporation of NGS is paramount to achieving value-based care [23, 24]. In this review, we provide a brief historical context on the evolution of NGS platforms to its current most widely-used commercial panels and compare specifications, mutation coverage, and costs of the more popular commercial platforms. In particular, we review our necessary and sufficient biomarkers that have come to clinical fruition. Through pre-established frameworks for evaluating value-based medicine, we highlight available data to assess the cost (efficiency), clinical benefit (effectiveness), and toxicity (safety) of genomic profiling in cancer care. We also provide perspectives on future directions of NGS from targeted panels to exomes/genomes and illustrate potential important strategies needed to attain value-based genomics.

## Historical perspective on next-generation sequencers

The completion of the human genome sequencing project in 2003 paved way for investigations focused on deciphering the human cancer genome [25]. The technology that sequenced the human genome was based on traditional Sanger sequencing and required about a decade of multicenter collaboration, automated analysis, and hundreds of millions of dollars [26, 27]. In the ensuing years, a paradigm shift occurred with the development of NGS techniques that accelerated the capability to analyze the cancer genome at speeds far superior than first-generation Sanger sequencing platforms [26, 28–30].

The commercialization and availability of these next-generation sequencers including those from Roche, Life Technologies SOLiD, Illumina, Pacific Biosciences, and Ion Torrent have since established the foundation for which most commercial NGS platforms operate from in tumor molecular profiling [27, 29, 31, 32]. The evolution of next-generation sequencers and comparisons of the technical specifications and costs across individual sequencers have been extensively reviewed [27, 29–32].

Currently, NGS technology can be broadly employed for 2 types of sequencing: targeted sequencing of a panel of recognized or putative cancer-associated genes and whole-exome or whole-genome sequencing (WES/WGS) for clinical-decision making, research purposes, and/or discovery of disease-causing genomic alterations [33].

The preference for targeted gene panels or WES or WGS remains a controversial topic of discussion in precision oncology. Large targeted panels were initially lauded for their improved efficiency, sensitivity, and ability to detect rare and potentially actionable genomic variants across tumor types compared to traditional smaller or multiple single-analyte gene panels [34]. Targeted panels have also been proposed as cost-effective and more readily interpretable than WES, while WES provides comprehensive profiling of all protein-encoding genes of the genome that can provide more information and long-term cost-effectiveness, over the life of the individual [35].

Nevertheless, gene panels are currently recommended by national guidelines such as the National Comprehensive Cancer Network (NCCN) in the diagnostic evaluation and management for several cancers and are recognized as a more pragmatic NGS-approach in universal healthcare systems [36, 37]. In the current state, targeted panels are more regularly used in cancer diagnostics while WES and WGS are not yet as incorporated into routine clinical practice in cancer care [38]. Cancer treatment pathways represent an increasingly important and popular mechanism to consolidate the massive amount of molecular data offered by NGS and patient care. Here, clinical pathways have been shown to facilitate the delivery of high-value cancer care by helping oncologists identify evidence-based treatments of greatest clinical benefit while reducing costs and likely represent a viable strategy for cost-effective precision oncology in the present and foreseeable future [23, 39, 40].

## Defining and measuring value in precision oncology

In its purest sense, value in oncology is defined as a measure of outcome per monetary expenditure where cancer therapies of high value lead to significant improvements in patient health outcomes at relatively low overall cost or risk [24, 41]. The Institute of Medicine (IOM) identified 6 elements of value in cancer care: effectiveness, safety, patient-centeredness, efficiency, timeliness of therapy, and equity [42]. Along similar lines, many oncology professional societies, government-sanctioned entities, and institutions across the globe have developed assessment tools and measures to evaluate the value of new therapies and health technologies in cancer care [41, 43–45]. In 2015, the ASCO Value in Cancer Task Force established their own framework and defined value in cancer care by clinical benefit (effectiveness), toxicity (safety), and cost (efficiency) with an update in 2016 [41, 45]. Although the ASCO task force recognized all 6 elements from the IOM's definition of value-based medicine, their framework in defining value in cancer care emphasizes the 3 elements that are believed to be more readily measured and reported as outcomes in clinical trials and therefore ascertainable from high-quality medical evidence.

## A framework for discussion of value-based genomics

To the best of our knowledge, discussions on value-based genomics, for which we define as the value of genomic profiling in cancer care through the current availability of NGS platforms, are relatively novel and limited compared to the growing discussions on value-based medicine focused on cancer drugs themselves. A similar conceptualized approach to assessing value in cancer genomics based on the ASCO framework is worthwhile to pursue and will be presented.

## Cost and comparison of commercial targeted gene panels

Next-generation sequencers became substantially more cost-effective with the authorization of the first sequencer by the U.S. Food and Drug Administration (FDA) in 2013 [46]. As a reference, to completely sequence the human genome and generate the first reference human genome sequence (about 3 billion bases of DNA), an extensive and global collaborative effort to produce a finished sequence of high fidelity was required with costs approximating hundreds of millions of dollars [47]. The Human Genome Project, in its entirety, took more than a decade to complete and produced a total cost of approximately 2.7 billion dollars [47]. With the reference human genome in hand and development of NGS technologies, sequencing an individual's "personal" genome was a more readily attainable endeavor though with costs ranging from about 14–25 million dollars by 2006 [47]. At the time of the FDA approval of the first next-generation sequencer in 2013, sequencing a human genome could be performed in about less than 24 hours and under \$5,000 [46]. Based on data collected by National Human Genome Research Institute (NHGRI)-funded genome-sequencing groups, the current cost to generate a whole-genome sequence is around \$1,500 (less for whole-exome) with variation above and below this number based on commercial pricing [47].

The affordability and availability of these next-generation sequencers have allowed for the commercialization of a growing number of CLIA-certified laboratories offering tumor genomic profiling by NGS. Excluding targeted gene panels derived by individual academic institutions, there are several commercial targeted panels that have found widespread use for clinical-decision making and research purposes. To enhance cost-effectiveness and time-efficiency, commercial NGS platforms have developed targeted enrichment methods to capture and sequence only genomic regions of interest including amplification- and probe-based enrichment methods or hybridization [48, 49]. Multiple targeted NGS platforms are commercially available (Table 1) with several having undergone validation or evaluation in the clinical setting [50–57]. All platforms aimed at detecting somatic mutations utilize formalin-fixed, paraffin-embedded (FFPE)

tumor tissue [58–65]. Companies such as Caris Molecular Intelligence perform analyses on fresh tissue or malignant fluid as well [59]. In general, the minimum required size of the sample is 5 mm<sup>2</sup> (25 mm<sup>2</sup> preferred) and the required ratio of tumor nuclei to benign nuclei is 20% [58]. Paradigm Cancer Diagnostic requires a minimum sample of 10 × 2 × 1 mm (20 mm<sup>3</sup>) with minimum 5% tumor content [62]. In addition to FFPE tumor samples, a few platforms analyze DNA from matched blood and/or saliva. Examples include OncoDNA and OncoSTRAT&GO [66] which performs genomic profiling on the tumor sample as well as on circulating tumor DNA, and Tempus xT and xO [61], which utilize blood or saliva samples to examine normal reference DNA. Ambry Genetics TumorNext uses paired blood-tumor samples to identify germline and somatic mutations in homologous recombination repair genes that predict response to PARP inhibitors [67].

The vast majority of panels utilize either Illumina or Ion Torrent sequencing (Table 1). With the exception of Quest OncoVantage [64, 65], most contemporary panels identify not only point mutations and insertions/deletions but also fusions/translocations and copy number variations. Many report microsatellite instability and tumor mutation burden to assist in identifying patients who may benefit from immunotherapy [58–61, 66]. In addition, many platforms incorporate results of immunohistochemistry (IHC) testing [59, 60, 62, 66]. The current movement is to not only look at the genomics but also proteomics. In terms of proteomics, IHC for PD-L1 has become standard in non-small cell lung cancer.

Turnaround time ranges from 4 days for Oncomine Dx, a 23-gene panel of lung-cancer related genes [63], to 21 to 28 days for Ambry Genetics TumorNext, which examines hereditary and somatic mutations in ovarian cancer patients [67]. Costs for testing are in the \$3000 to 6000 range where pricing information is available. Head-to-head comparisons of the various platforms are sparse. Weiss *et al.* compared Foundation One and Paradigm Cancer Diagnostic (PCDx) using tumor samples from 21 patients and reported a faster turnaround time for PCDx and significant discrepancies in detection of actionable targets between the two platforms [57].

ASCO has deemed both the Foundation Medicine and Caris Life Sciences platforms "optimized" for reporting for the Targeted Agent and Profiling Utilization Registry (TAPUR) study [68]. This non-randomized clinical trial aims to examine the use of targeted therapy for patients with advanced, progressive cancer who are found to have actionable variants on genomic testing. Currently, the Oncomine Dx Target Test and the FoundationFocus CDxBRCA Assay are the only commercial NGS platforms that are approved by the FDA for use as companion diagnostic devices [69].

Although early in its infancy, there is a growing body of research focused on total costs and cost-effectiveness analyses of cancer-related genome sequencing in the era

**Table 1: Selected commercially available targeted next-generation sequencing platforms and specifications**

|                                                               | Sample reqs                                                                                                                              | Sequencer   | Genes covered and mutation types (if specified*)                                                       | Additional analyses      | Cost*                  | Time       | Year released | Ref.*    |
|---------------------------------------------------------------|------------------------------------------------------------------------------------------------------------------------------------------|-------------|--------------------------------------------------------------------------------------------------------|--------------------------|------------------------|------------|---------------|----------|
| FoundationOne (Foundation Medicine)                           | -FFPE<br>-Prefer no decalcification, but may use EDTA                                                                                    | Illumina    | 315 genes (+28 introns)<br><br>fusions, copy number variations                                         | MSI<br>TMB               | 5800 USD               | 14 days    | 2011          | [50, 57] |
| Caris Molecular Intelligence (Caris Life Sciences)            | -FFPE<br>-Fresh specimen in 10% neutral buffered formalin<br>-Malignant fluid up to 120 cc<br>-No decalcified specimens                  | Illumina    | >600 genes<br><br>fusions, copy number variations                                                      | IHC<br>MSI<br>TMB<br>ISH | 6500 USD               | 10–14 days | 2014          | [51, 56] |
| OncoDEEP (OncoDNA)                                            | -FFPE<br>-Prefer no decalcification, but may use EDTA                                                                                    | Ion Torrent | 75 genes<br><br>fusions, methylation, splice variants                                                  | IHC<br>MSI<br>TMB        | ~3500 USD (2990 Euros) | 7 days     | 2014          | [52]     |
| OncoSTRAT&GO (OncoDNA)                                        | -FFPE <b>and</b> 2 10 mL blood samples (for ct DNA)                                                                                      | Ion Torrent | > 500 genes (solid portion) + 40 genes (liquid portion)<br><br>fusions, methylation, splice variants   | IHC<br>MSI<br>TMB        | ~5800 USD (4990 Euros) | 10 days    | 2016          |          |
| Tempus xT/xO (Tempus Labs)                                    | -FFPE <b>and</b> matched blood (solid tumors) or saliva (lymphoma) sample for normal DNA<br>-Prefer no decalcification, but may use EDTA | Illumina    | 595 genes (xT);<br>1711 genes (xO)<br><br>fusions, copy number variations, splice variants             | MSI<br>TMB               | 4800 USD (Tempus xO)   | 14–21 days | 2017          | [54, 55] |
| Paradigm Cancer Diagnostic – PCDx (Paradigm)                  | -FFPE                                                                                                                                    | Ion Torrent | 186 genes<br><br>fusions, copy number variations, splice variants                                      | IHC<br>MSI               | 4800 USD               | 5 days     | 2014          | [53, 57] |
| Oncomine Dx Target Test (Thermo Fisher Scientific)            | -FFPE                                                                                                                                    | Ion Torrent | 23 genes (NSCLC only)                                                                                  | -                        | -                      | 4 days     | 2017          |          |
| OncoVantage Solid Tumor Mutation Analysis (Quest Diagnostics) | -FFPE                                                                                                                                    | Ion Torrent | 34 genes<br><br>point mutations and indels only; <b>no</b> large rearrangements or copy number changes | -                        | 1800–3000 USD [73]     | 14 days    | 2014          |          |
| <b>Hereditary Cancer Panels</b>                               |                                                                                                                                          |             |                                                                                                        |                          |                        |            |               |          |
| OncoGeneDx Comprehensive Cancer Panel (GeneDx)                | -2–5 mL blood<br>-oral rinse or buccal swab as alternative                                                                               | Illumina    | 32 genes<br><br>(tumor-specific panels also available)                                                 | -                        | -                      | 21 days    | 2013          |          |
| TumorNext-HRD (Amby Genetics)                                 | -3–5 cc blood <b>and</b> FFPE                                                                                                            | Illumina    | 11 genes (mutations in homologous recombination repair genes, in ovarian cancer only)                  | -                        | -                      | 21–28 days | 2017          |          |



|                                |                                |          |                                                                                                        |   |              |               |      |
|--------------------------------|--------------------------------|----------|--------------------------------------------------------------------------------------------------------|---|--------------|---------------|------|
| CancerNext<br>(Ambry Genetics) | -6–10 cc blood<br>-1 cc saliva | Illumina | 34 genes<br><br>(tumor-specific panels<br>also available; expanded<br>67 gene panel also<br>available) | - | ~5830<br>USD | 14–21<br>days | 2012 |
|--------------------------------|--------------------------------|----------|--------------------------------------------------------------------------------------------------------|---|--------------|---------------|------|

\*Point mutations, insertions/deletions (indels) are covered unless otherwise stated.

†Prices are obtained from company websites or personal communication unless otherwise specified.

‡References provided for clinical validation studies, when available, for specific platform.

FFPE, formalin-fixed, paraffin-embedded; EDTA, ethylenediaminetetraacetic acid; IHC, immunohistochemistry; MSI, microsatellite instability; TMB, tumor mutation burden; ISH, in-situ hybridization; USD, United States dollars; NSCLC, non-small cell lung cancer.

of NGS (Table 2). An early cost analysis of WGS through the Illumina HiSeq 2000 platform considered total expenses through a 4-step process: sample collection and experimental design, sample sequencing, data reduction and management, and downstream analyses [70]. In 2011, the estimated cost to perform WGS considering only the first 3 steps was \$6,500 per assay over an approximate timeframe of 15 days. However, the authors forewarned that the rapid decreases in costs seen in data generation offered by advancing NGS technologies has not been matched by decreases in costs of the computational infrastructure needed to mine and manage the huge volume of data. Here, costs of downstream analyses were estimated to be onwards of an additional \$100,000 per assay and requiring months to process generated data. A systematic review of 5 fully-published studies at the time provided a cost analysis on cost per megabase (Mb) for using various NGS platforms but concluded that the results were very heterogeneous and questionable regarding their reliability and validity given the unclear methodology and numerous costs that may have been unaccounted for across studies [71]. In short, health economic evidence for genome sequencing was limited at the time of the review, and a comprehensive calculation of genomic sequencing considering multiple aspects of cost is needed. Similarly, a systematic review of included studies from 2009–2014 highlighted that NGS platforms were less costly than Sanger sequencing but concluded that the lack of randomized control trials (RCTs) investigating the cost-effectiveness of NGS limited the ability to conduct an informed cost-effectiveness analysis [72].

A later study incorporated a prediction model over a 2-year time horizon and performed a cost-effectiveness analysis of a 34-gene NGS panel vs. single-site BRAF<sup>V600</sup> mutation testing in metastatic melanoma patients (Table 2). The NGS panel was shown to be less costly (saving \$8,943 per patient) and was more effective than the single-site test [73]. Furthermore, sensitivity analyses showed that the NGS panel had a 90.9 % chance of having reduced costs and increased quality-adjusted life-years (QALYs) than single-site testing, and these findings would equate to an annual savings of \$79.6 million and a gain of 155 QALYs if applied to 8,900 metastatic melanoma patients. One study applied a decision model for patients referred to the medical genetics clinic for hereditary

colorectal cancer and polyposis (CRCP) syndromes to compare the cost-effectiveness of a NGS panel including Lynch syndrome genes and other genes associated with CRCP syndromes of high penetrance to standard of care (SOC) or sequential evaluation of Lynch syndrome genes recommended by current guidelines [74]. The NGS panel strategy was highly cost-effective below the contemporary \$100,000 per QALY threshold, when compared to SOC, and this was among the first studies to model NGS panels as a cost-effective strategy in the evaluation of a relatively common inherited cancer syndrome (Table 2).

A decision model of returning incidental findings (IFs) detected by a 56-gene NGS panel for patients with cardiomyopathy, colorectal cancer (CRC) or polyposis, and in healthy individuals referred for testing given family history and risk factors showed that returning IFs may be cost-effective for certain populations with incremental cost-effectiveness ratios (ICERs) of \$44,800, \$115,020, and \$58,600, respectively [75]. Notably, primary screening of healthy individuals (assuming NGS costs of \$500 per test) was not cost-effective with an ICER of \$133,400 (<\$100,000/QALY gained in only 10% of simulations). A recent study provided a microcosting analysis for targeted NGS panels and WES as well as a cost-impact analysis for patients diagnosed with advanced non-small cell lung cancer (NSCLC) employing NGS for optimization of first-line treatment (Table 2). A before and after comparison (time horizon of 6 months from diagnosis) showed that adopting NGS into management increased use of targeted therapy (6% to 13%), decreased use of nontargeted therapy (83% to 20%), decreased adverse events (AEs) from 207 to 138 (for a plan size of 1 million members), increased enrollment in clinical trials (4% to 54%), and increased referral to hospice care (7% to 13%) [76]. A Netherlands study provided a budget-impact analysis for implementation of NGS (48- and 178-gene panels) in stage IV NSCLC and melanoma patients within the Dutch health care system and demonstrated that the more samples that are run, the less costly NGS will become [77]. The budget analyses were comparable to a case study of 172 stage IV NSCLC and melanoma patients within the Netherlands Cancer Institute, and in a before and after NGS implementation comparison, there were no significant difference in treatment characteristics and clinical trial enrollment though an increased number of observed mutations in both cohorts was not surprisingly observed.

**Table 2: Summary of studies investigating the costs and cost-effectiveness of next-generation sequencing in cancer**

| Objective                                    | Platform                                                                                                      | Findings                                                                                                                                                                                                                                                                                                                                                                                                                                                                                                                                                                                                                       | Ref  |
|----------------------------------------------|---------------------------------------------------------------------------------------------------------------|--------------------------------------------------------------------------------------------------------------------------------------------------------------------------------------------------------------------------------------------------------------------------------------------------------------------------------------------------------------------------------------------------------------------------------------------------------------------------------------------------------------------------------------------------------------------------------------------------------------------------------|------|
| Microcosting analysis                        | WGS, Illumina HiSeq 2000                                                                                      | Estimated \$6,500 per case over a period 15 days for sample collection and experimental design, sample sequencing, and data reduction and management; for downstream analyses, an estimated additional >\$100,000 per case requiring months                                                                                                                                                                                                                                                                                                                                                                                    | [70] |
| Systematic review of cost analyses           | WGS/WES, various platforms                                                                                    | Variable cost per Mb ranging from <\$0.07-\$84.39/Mb and cost per sequencer ranging from \$155,000-\$1,350,000 per instrument depending on study                                                                                                                                                                                                                                                                                                                                                                                                                                                                               | [71] |
| Systematic review of cost-effectiveness      | WGS/WES/TGS, various platforms                                                                                | Compared to Sanger sequencing (approximately \$500/Mb), cost was less for NGS platforms (as low as \$0.10/Mb) but unable to perform informed analysis of the cost-effectiveness of NGS given insufficient high-quality evidence                                                                                                                                                                                                                                                                                                                                                                                                | [72] |
| Cost-effectiveness analysis                  | 34-gene NGS panel vs. single-site <i>BRAF</i> <sup>V600</sup> test                                            | Cost: \$128,965 vs. \$120,022 per patient (over 2-year time horizon) QALYs: 0.721 vs. 0.704 per patient (incremental 0.0174 QALYs with NGS over single-site testing over a 2-year time horizon)                                                                                                                                                                                                                                                                                                                                                                                                                                | [73] |
| Cost-effectiveness analysis                  | NGS panel vs. sequential evaluation for Lynch syndrome (SOC)                                                  | Compared to SOC, NGS panel resulted in an average increase of 0.151 year of life, 0.128 QALY, and \$4,650 per patient (ICER of \$36,500 per QALY with 99% probability of being cost-effective at \$100,000 per QALY threshold)                                                                                                                                                                                                                                                                                                                                                                                                 | [74] |
| Cost-effectiveness analysis of returning IFs | Receiving IFs vs. not receiving IFs from 56-gene NGS panel                                                    | For CRC patients, receiving IFs would increase costs by \$2.9 million and increase QALYs by 25.4 years (ICER of \$115,020) with <\$100,000/QALY gained 28%                                                                                                                                                                                                                                                                                                                                                                                                                                                                     | [75] |
| Microcosting and cost-impact analysis        | 5–50-gene and >50-gene NGS panel, WES                                                                         | Estimated total costs: \$577.99-\$907.82 (5–50 genes), \$1948 (>50 genes), \$1499.32-\$3388.18 (WES per case)<br>Cost-impact analysis for NGS implementation: Costs of targeted therapy increased from \$1.1 million to \$2.3 million, nontargeted therapy decreased from \$8.8 million to \$2.2 million, clinical trials increased by \$2.7 million, and hospice care increased by \$60,000; total cost of treatment decreased from \$10.2 million to \$7.5 million over a 6-month time horizon from diagnosis of advanced NSCLC and cost of genetic testing increases by \$0.13 million (assuming \$700 for 5–50-gene panel) | [76] |
| Microcosting and budget-impact analysis      | 48- and 178-gene NGS panel, Illumina Miseq or Hiseq                                                           | Estimated total costs per sample: €606–956 (48 genes), €1,137–2,668 (178 genes)<br>Budget-impact analysis for incorporation of NGS in Netherlands: Annual increase of €1,321,243 (2012–2015) and annual decrease of €120,473 (2020, projected due to more efficient use of WGS) for stage IV NSCLC, annual increase of €108,526 (2012–2015) and €351,799 (2020, projected due to more widespread use of NGS in hospitals) for stage IV melanoma                                                                                                                                                                                | [77] |
| Retrospective cost analysis                  | 96-gene NGS panel vs. SOC genomic testing only                                                                | Total costs (includes patient treatment, toxicity, sequencing, and targeted drug therapy): \$91,790 vs. \$40,782 per patient ( $p = 0.002$ )<br>Drug costs: \$59,259 vs. \$20,189 per patient ( $p < 0.001$ )<br>Patient charges per week: \$4,665 vs. \$5,000 per week ( $p = 0.126$ ) given that PFS 22.9 weeks (NGS group) vs. 12.0 weeks (SOC group, $p = 0.002$ ) with a HR of 0.47 (95% CI 0.29–0.75)                                                                                                                                                                                                                    | [78] |
| Time-and-motion microcosting analysis        | Digital GEP vs. FISH vs. 32-gene targeted NGS                                                                 | Mean per-case cost (assumes 180 cases annually, in Canadian dollars): \$898.35 vs. \$596.60 vs. \$1,029.16 (NGS includes bioinformatics analysis)<br>Labor-intensiveness: 258.2 minutes/case (FISH), 124.1 minutes/case (NGS, and 14.9 minutes/case (GEP)                                                                                                                                                                                                                                                                                                                                                                      | [79] |
| Cost-effectiveness analysis                  | 48-gene NGS panel and targeted therapy (off-label or clinical trial), no NGS and chemotherapy, no NGS and BSC | Life-years: Additional 0.009 LYs gained with NGS than chemotherapy or BSC (1.458 LYs) resulting in ICER of AUD 485,199/QALY<br>Chemotherapy produced gain of 0.001 QALYs when compared to BSC (ICER of AUD 361,580/QALY)<br>NGS produced gain of 0.008 QALYs when compared to chemotherapy (ICER of AUD 489,338/QALY)                                                                                                                                                                                                                                                                                                          | [80] |

|                                    |                                                                                                                            |                                                                                                                                                                                                                                          |      |
|------------------------------------|----------------------------------------------------------------------------------------------------------------------------|------------------------------------------------------------------------------------------------------------------------------------------------------------------------------------------------------------------------------------------|------|
| Prospective microcosting analysis  | 50-gene NGS panel guiding targeted therapy (biomarker-based) vs. targeted therapy without NGS (biomarker-agnostic) vs. BSC | Estimated total cost-per-patient for months (includes drug costs, outpatient visits, costs from management of AEs and/or procedure complications, and sequencing): €9,654–16,798 vs. €29,870–37,707 vs. €4,147–13,889                    | [81] |
| Microcosting analysis              | WGS, Illumina HiSeq 2500 and HiSeq Xten                                                                                    | Estimated overall costs per case (includes direct medical costs and site-specific costs for sequencing devices): €3858.06 (HiSeq 2500) and €1411.20 (HiSeq Xten)                                                                         | [82] |
| Microcosting and forecast analysis | WGS, Illumina HiSeq 2500 (including RNA sequencing)                                                                        | Estimated total costs per patient (2012–2015): \$34,886 (95% CI \$34,051–\$35,721).<br>10-year forecast: WGS and RNA sequencing costs will reach \$5000/patient by December 2019, \$3000 by November 2020, and \$1000 by September 2021. | [83] |
| Microcosting analysis              | 90-gene NGS panel (NextSeq500), WES (HiSeq4000) vs. WGS (HiSeqX5), all Illumina                                            | Estimated total costs per sample (includes capital costs, maintenance costs, and operational costs over 5 year life cycle): €332.90 vs. €791.75 vs. €1669.02                                                                             | [84] |

WGS, whole-genome sequencing; WES, whole-exome sequencing; Mb, megabase; TGS, targeted gene sequencing; NGS, next-generation sequencing; QALYs, quality-adjusted life-years; SOC, standard of care; ICER, incremental cost-effectiveness ratio; IFs, incidental findings; CRC, colorectal cancer; NSCLC, non-small cell lung cancer; PFS, progression-free survival; HR, hazard ratio; CI, confidence interval; GEP, gene expression profiling; FISH, fluorescence *in situ* hybridization; BSC, best supportive care; LYs, life-years; AUD, Australian dollar; AEs, adverse events.

A retrospective study of 72 patients with treatment-refractory advanced solid tumors demonstrated increased total patient care costs (mainly contributed by costs of drug therapy) using a management strategy guided by a 96-gene NGS panel compared to standard of care genomic testing only approach (Table 2). However, the significantly improved progression-free survival (PFS) seen in the precision medicine group over the control group (22.9 weeks vs. 12.0 weeks,  $p = 0.002$ ) translated to patient charges per week that were similar between both groups, suggesting that precision oncology potentially improves survival without increasing health care costs [78]. A time-and-motion microcosting analysis of 3 genomic assays (digital gene expression profiling (GEP), fluorescence *in situ* hybridization (FISH), and 32-gene targeted NGS panel) in the management of patients with non-Hodgkin lymphoma illustrated that FISH was found to be most labor-intensive followed by NGS and digital GEP, while targeted NGS with bioinformatics analysis had the highest mean per-case cost (in Canadian dollars) followed by digital GEP and FISH [79]. In an Australian cost-effectiveness analysis, the implementation of a 48-gene NGS panel leading to targeted therapy (off-trial or clinical trial setting) in the fourth-line treatment of metastatic NSCLC was found to have unfavorable ICERs (Table 2). The authors commented that reduction in off-label costs, lower mortality rates for true positive patients and during testing, lower health utility costs for progressive disease, and reductions in inpatient visits due to targeted therapy were all potential factors contributing to more favorable cost-effectiveness of a targeted NGS approach [80].

From 2014–2015, a Norwegian study prospectively enrolled 24 patients with refractory advanced solid tumors to 3 treatment strategies: best supportive care (BSC), targeted therapy without knowledge of a tumor biomarker (biomarker-agnostic), or targeted therapy guided by a 50-gene NGS panel (biomarker-based) and analyzed total cost-per-patient for each approach over 3 months [81]. Here, the biomarker-agnostic approach was approximately 2.5-fold more costly than the biomarker-based approach with the main drivers being drug costs and AE management. The biomarker-based approach was approximately 2.5-fold more costly than BSC and was mainly driven by costs of diagnostic procedures. A German study provided an overall cost analysis for WGS via Illumina platforms and showed that the latest HiSeq Xten was approximately 63% cheaper than the HiSeq 2500 platform (Table 2). Notably, the difficulty in the cost analysis for WGS was highlighted given the multitude of cost-influencing factors that were included and excluded in this study [82]. Furthermore, overhead costs should be considered to truly obtain a comprehensive cost analysis of WGS in the healthcare system. A separate British microcosting analysis of WGS over the 2012–2015 time period revealed higher median costs per patient likely due to apply both WGS and RNA sequencing over multiple samples to achieve a higher coverage rate of >80-fold than conventional 30-fold coverage [83]. Of note, 10-year forecasting scenarios did not produce expected WGS costs to reach \$1000 per patient in the next 10 years. A Dutch comparison of 3 leading Illumina NGS platforms: NextSeq500 90-gene targeted panel, HiSeq4000 WES, and HiSeqX5 WGS similarly showed that per-sample costs for

WGS did not reach the \$1000 threshold [84]. Although the targeted panel and WES were considerably cheaper alternatives than WGS, the decision to apply a specific platform to clinical practice should consider potential tradeoffs between costs and expected clinical utility of the selected approach.

### Clinical benefit or effectiveness

The topic of whether precision oncology improves clinical outcomes has been hotly debated [85, 86]. Often cited in these discussions, is the prospective phase II SHIVA trial that did not show superior outcomes in those with treatment-refractory advanced solid tumors matched to molecular targeted therapy based on molecular profiling, when compared to control, though this study has often been criticized for serious issues in methodologic design [87–89]. Conversely, preliminary results from the prospective phase I MOSCATO 01 and MD Anderson trials demonstrated feasibility and promising antitumor activity of targeted therapy matched according to NGS of tumors in previously-treated patients with advanced solid tumors [90–92]. To highlight the potential clinical benefit of NGS-directed or biomarker-driven therapy in cancer, we limited our review to data from the largest series and meta-analyses (Table 3) and defer discussion of smaller published studies elsewhere [13, 56, 93–97]. Studies in lung cancer have often served as the prototype for assessing the clinical benefit of molecular profiling in cancer management, and a large retrospective analysis of 143 single-agent phase II trials from 2000–2009 in >7,000 advanced NSCLC patients demonstrated superior median overall response rate (ORR), PFS, and overall survival (OS) in trials enriched for the presence of molecular targets compared to studies with unselected patients [98]. On multivariate analysis, enrichment for putative molecular targets was an independent predictor for greater ORR, PFS, and OS.

A meta-analysis of 112 registration trials (57 randomized and 55 nonrandomized) from 1998–2013 leading to FDA drug approvals in cancer therapy compared efficacy outcomes between therapies employing a personalized treatment approach (matched targeted therapy) vs. those that did not [99]. In randomized registration trials and experimental arms of all registration trials, personalized therapy was associated with higher response rates, longer PFS, and longer OS compared to nonpersonalized therapy arms (Table 3). Furthermore, a personalized treatment strategy was an independent predictor of improved response rate, PFS, and OS on multilinear regression analysis.

A subsequent meta-analysis of 570 single-agent phase II trials from 2010–2012 similarly investigated efficacy outcomes in 32,149 patients with various cancers treated with a personalized and nonpersonalized treatment strategy [100]. Compared to a nonpersonalized approach, a personalized approach consistently and independently

was associated with improved response rates, PFS, and OS (Table 3). Furthermore, nonpersonalized treatment arms had significantly poorer outcomes compared to either personalized or cytotoxic arms. Personalized arms employing a genomic biomarker had improved response rates, PFS, and OS (all  $p \leq 0.05$ ) compared to personalized arms using a protein marker.

A recent meta-analysis of 346 phase I trials from 2011–2013 evaluated the efficacy of biomarker-guided treatment selection (personalized) vs. treatment selection that was not biomarker-based (nonpersonalized) in 13,203 patients with solid tumors and hematologic malignancies [101]. Again, patients selected for treatment via a personalized approach had significantly improved median RR and PFS than those under a nonpersonalized approach (Table 3). Biomarker-based targeted therapy arms ( $n = 57$  trials) correlated with significantly improved RR compared with targeted therapy arms ( $n = 177$  arms) that were not biomarker-driven (31.1%, 95% CI 25.4%–37.4% vs. 5.1%, 95% CI 4.3%–6.0%,  $p < 0.001$ ). Nonpersonalized targeted therapy arms had outcomes comparable to cytotoxic arms, and personalized arms using a genomic biomarker had improved median RR than those employing a protein biomarker (42.0%, 95% CI 33.7%–50.9% vs. 22.4%, 95% CI 15.6%–30.9%,  $p = 0.001$ ).

Not surprisingly, genome sequencing is undergoing widespread implementation into routine cancer patient care (Supplementary Table 1). Molecular profiling is now incorporated into standard practice guidelines recommended by the NCCN while offering research value through facilitating the investigation of potential biomarkers of interest in breast [102–110], colorectal [111–115], gastroesophageal [116–122], hepatobiliary [123–127], pancreatic [128–130], gynecologic [131–143], prostate [144–152], other genitourinary (kidney, germ cell, and bladder) [153–166], lung [167–179], head and neck [180–187], melanoma [188–194], soft tissue sarcomas [195–204], and central nervous system cancers [205–212].

### Toxicity (including financial) and safety

In an early study assessing outcomes in 66 treatment-refractory metastatic cancer patients selected for therapy based on molecular profiling, safety analyses demonstrated no treatment-related deaths and 1 treatment discontinuation (1.5%) due to grade 2 fatigue using the molecular profiling treatment approach [56]. In a cost-impact analysis of advanced NSCLC patients employing NGS for optimization of first-line treatment, adaptation of NGS into management was shown to decrease the frequency of adverse events compared to the period prior to NGS incorporation [76].

In a meta-analysis of 112 registration trials leading to FDA-approved cancer therapies, the treatment-related mortality rate was 1.6% (95% CI 1%–2.4%) for trials employing a personalized strategy (matched



**Table 3: Summary of large series and meta-analyses evaluating the clinical benefit or effectiveness of molecular profiling in cancer**

| Design, <i>n</i>                           | <i>n</i>                                                                | Findings                                                                                                                                                                                                                                                                                                                                                                                                                                                                                                                                                                                                                                                                                                               | Ref   |
|--------------------------------------------|-------------------------------------------------------------------------|------------------------------------------------------------------------------------------------------------------------------------------------------------------------------------------------------------------------------------------------------------------------------------------------------------------------------------------------------------------------------------------------------------------------------------------------------------------------------------------------------------------------------------------------------------------------------------------------------------------------------------------------------------------------------------------------------------------------|-------|
| Retrospective, 143 phase II trials         | 7, 701 advanced NSCLC patients                                          | 12 studies enriched for the presence of molecular targets had improved median ORR 48.8% (IQR 71, $p = 0.005$ ), PFS 6 months (IQR 6.8, $p = 0.005$ ), and OS 11.3 months (IQR 11.2, $p = 0.05$ ) compared to 9.7% (IQR 13.6), 2.8 months (IQR 1.9), and 7.5 months (IQR 3.2), respectively, in studies with unselected patients; enrichment for putative molecular targets was independent predictors of ORR, PFS, and OS on multivariate analysis (all $p \leq 0.005$ )                                                                                                                                                                                                                                               | [98]  |
| Meta-analysis, 112 FDA registration trials | 38, 104 patients with various solid tumors and hematologic malignancies | In randomized trials ( $n = 57$ ): Improved RRR 3.82 (95% CI 2.51–5.82, adjusted $p = 0.03$ ), longer PFS (HR 0.41, 95% CI 0.33–0.51, $p < 0.001$ ), and longer OS (HR 0.71, 95% CI 0.61–0.83, $p = 0.07$ ) with personalized therapy compared to RRR 2.08 (95% CI 1.76–2.47), PFS (HR 0.59, 95% CI 0.53–0.65), and OS (HR 0.81, 95% CI 0.77–0.85) with nonpersonalized therapy arms<br>In experimental arms in all 112 trials: Personalized therapy had higher response rate (48%, 95% CI 42%–55% vs. 23%, 95% CI 20%–27%, $p < 0.001$ ), longer median PFS (8.3 months, IQR 5 vs. 5.5 months, IQR 5, adjusted $p = 0.002$ ), and longer median OS (19.3 months, IQR 17 vs. 13.5 months, IQR 8, adjusted $p = 0.04$ ) | [99]  |
| Meta-analysis, 570 phase II trials         | 32, 149 patients with various solid tumors and hematologic malignancies | On multivariable analysis, personalized treatment approach (vs. nonpersonalized approach), had higher median RR (31% vs. 10.5%, $p < 0.001$ ), longer median PFS (5.9 vs. 2.7 months, $p < 0.001$ ), and longer median OS (13.7 vs. 8.9 months, $p < 0.001$ )<br>Nonpersonalized arms had poorer outcomes compared with personalized or cytotoxic arms with median RR of 4%, 30%, and 11.9%, respectively, median PFS of 2.6, 6.9, and 3.3 months, respectively (all $p < 0.001$ ), and median OS of 8.7, 15.9, and 9.4 months, respectively (all $p < 0.05$ )                                                                                                                                                         | [100] |
| Meta-analysis, 346 phase I trials          | 13, 203 patients with various solid tumors and hematologic malignancies | Compared to a nonpersonalized approach, a personalized approach had higher median RR (30.6%, 95% CI 25.0%–36.9% vs. 4.9%, 95% CI 4.2%–5.7%, $p < 0.001$ ) and longer median PFS (5.7 months, 95% CI 2.6–13.8 vs. 2.95 months, 95% CI 2.3–3.7, $p < 0.001$ )<br>Nonpersonalized targeted arms had comparable outcomes to cytotoxic arms: Median RR 5.1% (95% CI 4.3%–6.0%) vs. 4.7% (95% CI 3.6%–6.2%, $p = 0.63$ ) and median PFS 3.3 months (95% CI 2.6–4.0) vs. 2.5 months (95% CI 2.0–3.7, $p = 0.22$ ), respectively                                                                                                                                                                                               | [101] |

NSCLC, non-small cell lung cancer; ORR, overall response rate; IQR, interquartile range; PFS, progression-free survival; OS, overall survival; FDA, Food and Drug Administration; RRR, relative response rate; HR, hazard ratio; CI, confidence interval; RR, response rate.

targeted therapy) and similar to the 1.4% (95% CI 1%–2%,  $p = 0.74$ ) for nonpersonalized trials [99]. That a personalized treatment approach was not more toxic than nonpersonalized treatment strategies was also shown in a meta-analysis of 346 phase I cancer trials where the median treatment-related mortality rate was 1.89% (95% CI 1.36%–2.61%) for arms using a personalized strategy

and 2.27% (95% CI 1.97%–2.62%,  $p = 0.31$ ) for arms without a personalized strategy [101]. A large meta-analysis of 570 single-agent phase II trials even demonstrated a lower median treatment-related mortality rate of 1.52% (95% CI 1.23%–1.87%) in personalized treatment arms compared to 2.26% (95% CI 2.04%–2.49%,  $p < 0.001$ ) in nonpersonalized arms [100]. Further analysis confirmed that

cytotoxic agents had higher median treatment-related death rates (2.42%, 95% CI 2.08%–2.83%) than targeted therapy arms (median 1.94%, 95% CI 1.74%–2.17%,  $p = 0.023$ ). In addition to the potentially increased morbidity and mortality from treatment-related AEs in nonpersonalized strategies, AE management has been shown to be a main driver of cost and reason for greater expenses with therapies not based on biomarker strategies compared to biomarker-based approaches [81].

A recent meta-analysis of 41 randomized clinical trials evaluating 28 targeted agents for solid tumors approved by the FDA since 2000 evaluated the rate of treatment-discontinuation due to toxicity and grade 3–4 AEs and showed that targeted therapies with companion diagnostics were associated with improved safety and tolerability [213]. Specifically, agents with companion diagnostics compared to those without companion diagnostics had lower odds of treatment discontinuation (odds ratio (OR) 1.12 vs. 1.65,  $p < 0.001$ ) and grade 3–4 AEs (OR 1.09 vs. 2.10,  $p < 0.001$ ) with differences in safety being greatest for gastrointestinal, neurologic, and cutaneous toxicity. Indeed, the FDA has recently implemented a policy requiring the co-approval of a diagnostic with a therapeutic agent when the companion diagnostic is essential to the safe and effective use of the therapeutic product [214]. To achieve this, the FDA has executed numerous accommodations to facilitate this process without slowing the approval of the co-developed products.

Beyond the toxicities associated with cancer therapies, the financial toxicity associated with cancer care is becoming increasingly relevant in the face of rising cancer care costs and given that out-of-pocket expenses, copayments, and insurance premiums can often cause significant financial stress and burden to cancer patients that can adversely affect QOL and outcomes [21, 22]. Accordingly, evidence-based financial toxicity grading systems analogous to the NCI-Common Terminology Criteria for Adverse Events grading system have been developed and are undergoing validation [215].

A timely study has been conducted in recognition that tailoring cancer therapies to individual patients based on NGS is an emerging field that lacks formal coverage by the majority of U.S. payers [216]. Here, interviews of private payers covering more than 2/3 of the U.S. insured population provided perspectives and challenges that remain to NGS reimbursement. Of 7 senior executives from the 10 largest U.S. health plans and regional plans covering >125 million enrollees interviewed, 80% agreed that NGS has substantive potential to benefit and transform the state of cancer care. However, 80% of the panel agreed that NGS does not fit the definition of “medically necessary” and is considered “experimental or investigational.” One additional concern was that coverage in this instance may appear as an endorsement for novel targets and related off-label use. Notably, 40% considered a pan-cancer NGS application beneficial

given that it is already common in oncology and provides rationale for off-label drug use, and although formal coverage for pan-cancer therapies may not be provided by payers, payment could be continued on exception bases. Furthermore, 70% of the panel recognized that NGS represents a misalignment to the “single test/single result” contemporary coverage approach, while 60% believed that the accompanying bioinformatics should be considered its own diagnostic for which there has been no precedent to pay for separately. For reasons including lack of large correlative studies and lack of experience with new study methodologies, 70% of the panel believe that the current evidence methods proposed for NGS do not fit payers’ evidentiary standards. Lastly, for reasons including potential for departure from standard care protocols, lack of transparency on NGS application, and lack of competent infrastructure, 50% of the panel raised concerns regarding the adoption and implementation of NGS in cancer care.

## DISCUSSION

In this review, we highlighted available data through the ASCO Value in Cancer Task Force framework to assess the value of genomic profiling in cancer care. Advancements in NGS technologies and our greater understanding of tumor molecular biology have, in part, led to achievements in cost (efficiency), clinical benefit (effectiveness), and toxicity (safety) in precision oncology. However, significant challenges remain and need to be considered in order to attain value-based genomics.

Genomic profiling has become undeniably more cost-effective since the time of the human genome sequencing project when the cost of sequencing the human genome ranged in the hundreds of millions of dollars and took over a decade to complete to current NGS platforms that can sequence an individual’s genome on the order of days with costs that range in the thousands of dollars [46, 47]. Several studies have shown the cost-effectiveness of NGS panels over single-analyte tests, over SOC sequential genetic testing, and in one instance, a NGS-guided treatment strategy showed improvement in survival without increasing healthcare costs compared to a SOC genomic testing only approach [73, 74, 78]. In another study, implementation of targeted therapy based on NGS in refractory metastatic NSCLC produced an unfavorable ICER suggesting that this approach was not cost-effective [80]. Several studies have shown that NGS panels and related management strategies are less costly than Sanger sequencing, targeted therapy approaches without NGS, or treatment of advanced NSCLC without incorporation of NGS in management [72, 76, 81]. One cost analysis forecasted that costs of WGS would gradually decrease over 10-years to a projected \$1000 by September 2021 [83]. Other studies have demonstrated a wide range of costs of NGS across platforms (Table 2).

Despite the progress and promise shown in improving the cost-effectiveness of genomic sequencing in cancer care, the mixed results presented in the literature likely reflect that data from current studies assessing the costs and cost-effectiveness of NGS-based strategies are still early and relatively limited. Several systematic reviews have emphasized that there is a lack of robust published data to make an informed analysis on the cost-effectiveness of NGS and current evidence is quite heterogeneous and difficult to compare given the unclear and poor study methodologies and uncertain reproducibility of published results [71, 72]. For example, many cost estimates are based on published price lists of NGS technologies from manufacturers that often neglect the multidisciplinary nature of the work including necessary personnel, bioinformatics, and laboratory oversight [217]. Cost estimates are also limited in their applicability given that assumptions factored into cost calculations are not always transparent. Furthermore, some research institutions and manufacturers provide genomic sequencing services for profit and therefore using published pricing estimates to inform decision making in publicly-funded healthcare systems may not be directly translatable and are often not recommended.

The seemingly disparate range of costs for NGS across studies underscores the tendency to focus on expenses related to procurement and running of NGS platforms with failure to account for the real costs of the entire genome sequencing workflow, including data management and analysis [71]. The contribution of subsequent analyses to overall costs of NGS is becoming increasingly important to consider as recent projection analyses have shown that as sequencing costs continue to decrease over time, costs associated with analysis of data downstream of sequencing are expected to grow by approximately 50% between 2010 and 2020 [70, 218]. To improve assessments of the cost-effectiveness of NGS strategies, several factors need to be considered: 1.) conducting more comprehensive cost calculations with transparency of genomic sequencing that include costs of products and consumables, inpatient vs. outpatient expenses, costs based on diagnostic context (e.g., NGS to inform cancer care vs. NGS to diagnose a rare disease in genetic counseling), approach and technology used (e.g., cost per Mb and sequencing time), personnel and labor costs, costs of bioinformatics, and additional cost factors such as overhead costs, 2.) redefining the conventional \$50,000 per QALY threshold to reflect higher and more contemporary cost-per-QALY thresholds, and 3.) placing value on sequencing results that could affect family members and/or economic impact of secondary findings or incidental findings [71, 82, 219, 220].

A comprehensive understanding of costs as just described is critical to our ability to assess the cost-effectiveness of NGS in cancer care; however, development of strategies to improve the costs and efficiency of precision

oncology requires a greater understanding of health economics and policy, which is beyond the scope of this review. In general, as increasing commercialization and application of NGS in clinical and research settings are expected, costs for equipment and consumables may lower as a result of competition and economies of scale [84]. In the U.S., the Orphan Drug Act of 1983 (ODA) pathway, the extent that precision drugs are more likely to be biologic and require technology-intensive manufacturing, development of biomarkers and diagnostics, and costs needed to justify expected research and development expenditures are all factors critical in shaping the pricing of precision medicine [221]. Implementing financial instruments similar to mortgages that spread the costs of high-value, high-price treatment approaches over time, spreading costs over larger insurance pools or publicly financed “high-risk pools,” and creating price competition through expediting biosimilar approval, encouraging physician use of biosimilars, and stimulating brand-brand and biologic-biosimilar competition represent several proposed and potential means of offering financial relief for patients and payers of precision oncology strategies [221]. Last but not least, cancer treatment pathways represent a growing and ever-important concept with potential to incorporate molecular profiling in promoting high-value care through helping oncologists identify evidence-based treatments of greatest clinical benefit while reducing costs [23, 39, 40].

The evidence supporting the clinical benefit (effectiveness) of NGS in cancer care appears relatively more robust than those supporting its cost-effectiveness. Guidelines currently recommend molecular profiling as standard practice in the management of a growing number of cancers (Supplementary Table 1). Aside from the value to routine cancer care, NGS provides research value through expediting the detection of novel biomarkers with the potential to further improve patient outcomes in the future. Furthermore, meta-analyses of >1,000 prospective clinical trials enrolling >80,000 patients with solid tumors and hematologic malignancies have shown superior outcomes in those with personalized treatment strategies over those in nonpersonalized management arms (Table 3). Mature and final results from a number of cancer clinical trials matching targeted therapy to genomic profiling are eagerly awaited to see if further support for precision oncology is provided [9–17]. Again, clinical pathways in cancer represent a potential but important avenue to maximize clinical benefit through incorporation of genomic sequencing [39, 40].

To further enhance our ability to achieve clinical benefit or effectiveness in cancer care through NGS, we should understand that not all NGS platforms are equivalent in performance and applicability in the clinic. Currently there are several types of NGS platforms including single-gene tests, targeted gene panels utilizing polymerase chain reaction (PCR)-based techniques or DNA captures, WES, and WGS [77, 84]. Differences



in coverage across platforms have been the subject of early studies [84, 222, 223]. NGS targeted panels have been reported to have approximately 4- to 5-fold greater coverage than WES, while another report illustrates the average coverage for targeted panels to be 100X, 70X for WES, and 30X for WGS [84, 223]. For high-quality genome data, many commercial entities recommend 30X coverage for WGS to represent a contemporary benchmark [82, 84]. Despite typically greater coverage for targeted panels, variability in the coverage of designed probes targeting a genomic region of interest have been shown across commercially available target enrichment methods [48]. Additionally, missed opportunities for treatment have been shown in cross-comparisons of NGS panels where instances of missed germline mutations and copy number variation detection occurred [49].

Recent results suggest that for Mendelian diseases and certain cancers WES may achieve a diagnostic yield similar to panel-based targeted sequencing though a higher false negative rate should be considered for WES use in cancer [224, 225]. In addition, one investigation has demonstrated a high concordance with WES across institutions [226]. On the contrary, comparison of WES to WGS may result in small differences in diagnostic yield given that WES accounts for all protein-coding regions in which 85% of all mutations are believed to occur [84]. Evidence suggests that single-gene tests are best served in clinical scenarios with minimal locus heterogeneity while NGS panels are less useful in those with extreme heterogeneity where targeted panels identify fewer actionable alterations than other platforms – in instances of rare diseases or in patients with an abnormal or unknown phenotype, WGS may provide the diagnostic solution [82, 223]. Certainly, WGS has established a diagnostic role in medical genetics, typically after first-tier testing [223]. However, WGS has been associated with a greater potential to detect IFs compared to targeted panels (less likely) and single-gene tests (no IFs), which given the increased costs and possible complications incurred from further diagnostic work-up prohibits its widespread and first-tier application except in certain conditions [82, 223]. One group has recently proposed a role for WGS as a first-tier genetic test given the improved diagnostic yield compared with targeted gene sequencing panels and WES in a pediatric population [227]. For cancer care, WGS may ultimately generate more cost savings if used as a first-tier strategy given the potential for earlier diagnoses and avoidance of ineffective therapy as well as identification of resistance mechanisms to often expensive therapeutic agents [83].

Along these latter lines, analysis of cell-free circulating tumor DNA (ctDNA) represents a promising development that can optimize clinical benefit in cancer treatment given its ability to detect resistance mutations and serially monitor a tumor's molecular profile to various pressures including systemic therapy [228–230]. Extension

of targeted deep sequencing that allows for detection of DNA rearrangements and copy number variations to whole-exome or whole-genome approaches in plasma has afforded predictive and prognostic information in cancer patients. In addition, ctDNA analysis is relatively simple and noninvasive compared to tissue biopsy and the ability to collect serial assays and provide comprehensive molecular profiling over time can address concerns regarding genetic heterogeneity in tumor specimens procured from tissue biopsies.

In the current landscape, targeted gene panels and single-gene testing are recommended by national guidelines (NCCN) and are more routinely used in the diagnostic evaluation and management for several cancers while WES and WGS are not yet as incorporated into routine clinical practice in cancer care [36–38]. With the continued development and decrease in costs of NGS technologies, the streamlining of WGS into a single laboratory workflow and one-time test providing the basis for lifelong follow-up that replaces other sequencing tests is within reach in the foreseeable future [223]. Notably, as NGS becomes more entrenched in routine cancer care, further development of NGS targeted panels should undergo rigorous validation that requires adequate training of pathologists and refinement of international laboratory standards [231]. Similar stringent guidelines for validation of WES and WGS will be required as well, should these platforms become further implemented in cancer care and research [232].

Targeted gene panels and WES are relatively less costly than WGS, although this price gap is narrowing (Table 2). Targeted gene panels often require complementary assays to detect duplications and deletions and Sanger sequencing for confirmation while WES often requires Sanger sequencing for confirmation as well [223]. Furthermore, a major obstacle to the routine clinical application of NGS has been interpretation of the large number of sequencing variants and variants of unknown significance (VUS) of which published results to help assess variant pathogenicity provided by public and commercial databases can often contain ambiguous or insufficient information that may potentially lead to overassessment of pathogenicity and misdiagnosis [223]. Of the number of VUS that are potentially detected, single-gene tests detect the fewest followed by targeted gene panels and WES which can detect large numbers of VUS. Ultimately, the decision to proceed with a clinical sequencing platform and method is dependent on numerous considerations including, but not limited to, required turnaround time, samples to be tested, type and complexity of the genetic variants to be assessed, required sensitivity, degree of bioinformatics support, infrastructure, and resources available in the laboratory (particularly computational resources), expected volume of testing, and overall costs per sample [84, 233].



Although molecular profiling can improve safety and tolerability regarding to toxicities associated with cancer therapies, financial toxicity remains a major looming challenge to achieving value-based genomics. As highlighted by a timely study, U.S. payers in general believe that NGS does not fit the definition of medically necessary and is considered experimental or investigational, NGS represents a misalignment to the single test/single result contemporary coverage approach, current evidence methods proposed for NGS do not fit payers' evidentiary standards, and that issues regarding the adoption and implementation of NGS in cancer care will arise given the potential for departure from standard care protocols, lack of transparency on NGS application, and lack of competent infrastructure [216].

The authors in this study propose 2 general approaches to increase payer coverage: redefine NGS to satisfy the current coverage and evidence framework or redefine the current coverage and evidence framework to satisfy NGS. For within the current coverage framework approach, evidentiary challenges, for example, could be addressed by collaboration with the health technology and pharmaceutical industry, physicians and healthcare providers, policy-makers, and stakeholders to agree on novel research methods and develop corresponding evidence [216]. Spreading the costs of high-value, high-price treatment approaches over time, spreading costs over larger insurance pools or publicly financed high-risk pools, and creating price competition in precision oncology are also potential strategies to provide financial relief for patients and payers within the current framework [221]. Furthermore, success of basket trials or trials investigating targeted therapy matched by genomic profile can reduce both the cost and length of trials allowing more drugs to become more commercially viable that can lead to more innovation and competition [221]. Payers have shown enthusiasm regarding the value of pathways as they reduce unwarranted variation in care and improve adherence to evidence-based medicine; further development of clinical pathways that incorporate genomics-based treatment represents an additional strategy within the current framework to improve payer coverage [39, 40]. Pan-cancer NGS applications are becoming more common and provide rationale for off-label drug use allowing for payment that can be continued on exception bases as another method to reduce financial toxicity [216].

The second approach of redefining the current coverage and evidence framework to satisfy NGS is undoubtedly more complex [216]. Here, the authors comment that this approach would require collaboration with stakeholders to explicitly identify and define coverage disruptive features of NGS, modify the evidentiary framework including evidence research methods and approach to assessing evidence, and adjust the current coverage framework to align with the evidentiary framework and permit incorporation of NGS benefits.

In essence, proactive multidisciplinary efforts to define methods of evidence generation, the direction for which NGS development should proceed, and implementation into coverage policy are fundamental aspects to this approach that although seemingly uncertain can provide unprecedented benefits and reduce financial toxicity in the era of precision oncology.

Lastly, our analysis is based primarily on available data, especially from the U.S. It will now be important to accumulate and analyze data to assess the value of genomics in cancer care from other countries. We hope that in the future there will ultimately be international guidelines for genomics in oncology.

## CONFLICTS OF INTEREST

All authors declare no potential conflicts of interest.

## FUNDING

Research reported in this publication was supported by the National Cancer Institute of the National Institutes of Health under award numbers P30CA033572 and 1U54CA209978-01A1. The content is solely the responsibility of the authors and does not necessarily represent the official views of the National Institutes of Health.

## REFERENCES

1. National Research Council. *Toward precision medicine: building a knowledge network for biomedical research and a new taxonomy of disease*. Washington, DC: The National Academies Press; 2011. <https://doi.org/10.17226/13284>.
2. Collins FS, Varmus H. A new initiative on precision medicine. *N Engl J Med*. 2015; 372:793–795.
3. Fisher B, Costantino JP, Wickerham DL, Redmond CK, Kavanah M, Cronin WM, Vogel V, Robidoux A, Dimitrov N, Atkins J, Daly M, Wieand S, Tan-Chiu E, et al. Tamoxifen for prevention of breast cancer: report of the National Surgical Adjuvant Breast and Bowel Project P-1 Study. *J Natl Cancer Inst*. 1998; 90:1371–1388.
4. Fisher B, Jeong JH, Bryant J, Anderson S, Dignam J, Fisher ER, Wolmark N, and National Surgical Adjuvant Breast and Bowel Project randomised clinical trials. Treatment of lymph-node-negative, oestrogen-receptor-positive breast cancer: long-term findings from National Surgical Adjuvant Breast and Bowel Project randomised clinical trials. *Lancet*. 2004; 364:858–868.
5. Jordan VC. Tamoxifen as the first targeted long-term adjuvant therapy for breast cancer. *Endocr Relat Cancer*. 2014; 21:R235–R246.
6. Druker BJ, Sawyers CL, Kantarjian H, Resta DJ, Reese SF, Ford JM, Capdeville R, Talpaz M. Activity of a specific inhibitor of the BCR-ABL tyrosine kinase in the blast

- crisis of chronic myeloid leukemia and acute lymphoblastic leukemia with the Philadelphia chromosome. *N Engl J Med.* 2001; 344:1038–1042.
7. Druker BJ, Talpaz M, Resta DJ, Peng B, Buchdunger E, Ford JM, Lydon NB, Kantarjian H, Capdeville R, Ohno-Jones S, Sawyers CL. Efficacy and safety of a specific inhibitor of the BCR-ABL tyrosine kinase in chronic myeloid leukemia. *N Engl J Med.* 2001; 344:1031–1037.
  8. Hochhaus A, Larson RA, Guilhot F, Radich JP, Branford S, Hughes TP, Baccarani M, Deininger MW, Cervantes F, Fujihara S, Ortman CE, Menssen HD, Kantarjian H, et al. Long-term outcomes of imatinib treatment for chronic myeloid leukemia. *N Engl J Med.* 2017; 376:917–927.
  9. Coyne GO, Takebe N, Chen AP. Defining precision: The precision medicine initiative trials NCI-MPACT and NCI-MATCH. *Curr Probl Cancer.* 2017; 41:182–193.
  10. Gerber DE, Oxnard GR, Govindan R. ALCHEMIST: Bringing genomic discovery and targeted therapies to early-stage lung cancer. *Clin Pharmacol Ther.* 2015; 97:447–450.
  11. Herbst RS, Gandara DR, Hirsch FR, Redman MW, LeBlanc M, Mack PC, Schwartz LH, Vokes E, Ramalingam SS, Bradley JD, Sparks D, Zhou Y, Miwa C, et al. Lung master protocol (Lung-MAP)—A biomarker-driven protocol for accelerating development of therapies for squamous cell lung cancer: SWOG S1400. *Clin Cancer Res.* 2015; 21:1514–1524.
  12. Carey LA, Winer EP. I-SPY 2—toward more rapid progress in breast cancer treatment. *N Engl J Med.* 2016; 375:83–84.
  13. Kris MG, Johnson BE, Berry LD, Kwiatkowski DJ, Iafrate AJ, Wistuba II, Varella-Garcia M, Franklin WA, Aronson SL, Su PF, Shyr Y, Camidge DR, Sequist LV, et al. Using multiplexed assays of oncogenic drivers in lung cancers to select targeted drugs. *JAMA.* 2014; 311:1998–2006.
  14. Andrews A. ASCO and NCI launch largest precision medicine trials using real-world evidence. *Am Health Drug Benefits.* 2015; 8:37.
  15. Seibel NL, Janeway K, Allen CE, Chi SN, Cho YJ, Glade Bender JL, Kim A, Laetsch TW, Irwin MS, Takebe N, Tricoli JV, Parsons DW. Pediatric oncology enters an era of precision medicine. *Curr Probl Cancer.* 2017; 41:194–200.
  16. Takebe N, McShane L, Conley B. Biomarkers: exceptional responders-discovering predictive biomarkers. *Nat Rev Clin Oncol.* 2015; 12:132–134.
  17. VanSickle E, Zhao P, Mitchell D, Foley J, Steinbrecher J, Rich M, Nagulapally A, Bond J, Hendricks W, Sholler GS. The Signature Study: Molecular analysis of pediatric tumors with establishment of tumor models in a biology study. *Cancer Res.* 2017; 77:abstr. 4869.
  18. Innovate UK. Developing personalised medicine technologies: Apply for funding <https://www.gov.uk/government/news/developing-personalised-medicine-technologies-apply-for-funding>. Accessed November 13, 2017.
  19. Ashley EA. Towards precision medicine. *Nat Rev Genet.* 2016; 17:507–522.
  20. Ganesan S, Rodriguez-Rodriguez L, DiPaola RS. Precision medicine: Implications for science and practice. *J Am Coll Surg.* 2016; 223:433–439.
  21. Young RC. Value-based cancer care. *N Engl J Med.* 2015; 373:2593–2595.
  22. Chino F, Peppercorn JM, Rushing C, Kamal AH, Altomare I, Samsa G, Zafar SY. Out-of-pocket costs, financial distress, and underinsurance in cancer care. *JAMA Oncol.* 2017. <https://doi.org/10.1001/jamaoncol.2017.2148>.
  23. Brooks GA, Bosserman LD, Mambetsariev I, Salgia R. Value-based medicine and integration of tumor biology. *Am Soc Clin Oncol Educ Book.* 2017; 37:833–840.
  24. Johansen NJ, Saunders CM. Value-based care in the worldwide battle against cancer. *Cureus.* 2017; 9:e1039.
  25. Wheeler DA, Wang L. From human genome to cancer genome: the first decade. *Genome Res.* 2013; 23:1054–1062.
  26. El-Metwally S, Ouda OM, Helmy M. First- and next-generation sequencing methods. *Next Generation Sequencing Technologies and Challenges in Sequence Assembly*: Springer, New York, NY). 2014; 29–36.
  27. Mardis ER. A decade's perspective on DNA sequencing technology. *Nature.* 2011; 470:198–203.
  28. Goodwin S, McPherson JD, McCombie WR. Coming of age: ten years of next-generation sequencing technologies. *Nat Rev Genet.* 2016; 17:333–351.
  29. Heather JM, Chain B. The sequence of sequencers: The history of sequencing DNA. *Genomics.* 2016; 107:1–8.
  30. Mardis ER. Next-generation sequencing platforms. *Annu Rev Anal Chem.* 2013; 6:287–303.
  31. El-Metwally S, Ouda OM, Helmy M. Next-generation sequencing platforms. *Next Generation Sequencing Technologies and Challenges in Sequence Assembly*: Springer, New York, NY). 2014; 37–44.
  32. Quail MA, Smith M, Coupland P, Otto TD, Harris SR, Connor TR, Bertoni A, Swerdlow HP, Gu Y. A tale of three next generation sequencing platforms: comparison of Ion Torrent, Pacific Biosciences and Illumina MiSeq sequencers. *BMC Genomics.* 2012; 13:341.
  33. Khotskaya YB, Mills GB, Mills Shaw KR. Next-generation sequencing and result interpretation in clinical oncology: Challenges of personalized cancer therapy. *Annu Rev Med.* 2017; 68:113–125.
  34. Schram AM, Berger MF, Hyman DM. Precision oncology: Charting a path forward to broader deployment of genomic profiling. *PLoS Med.* 2017; 14:e1002242.
  35. Feliubadaló L, Tonda R, Gausachs M, Trotta JR, Castellanos E, López-Doriga A, Teulé À, Tornero E, Del Valle J, Gel B, Gut M, Pineda M, González S, et al. Benchmarking of whole exome sequencing and ad hoc designed panels for genetic testing of hereditary cancer. *Sci Rep.* 2017; 7:37984.
  36. Hynes SO, Pang B, James JA, Maxwell P, Salto-Tellez M. Tissue-based next generation sequencing: application in a universal healthcare system. *Br J Cancer.* 2017; 116:553–560.

37. Shen T, Pajaro-Van de Stadt SH, Yeat NC, Lin JC. Clinical applications of next generation sequencing in cancer: from panels, to exomes, to genomes. *Front Genet.* 2015; 6:215.
38. Yohe S, Thyagarajan B. Review of clinical next-generation sequencing. *Arch Pathol Lab Med.* 2017. <https://doi.org/10.5858/arpa.2016-0501-RA>.
39. Newcomer LN, Malin JL. Payer view of high-quality clinical pathways for cancer. *J Oncol Pract.* 2017; 13:148–150.
40. Zon RT, Edge SB, Page RD, Frame JN, Lyman GH, Omel JL, Wollins DS, Green SR, Bosserman LD. American Society of Clinical Oncology criteria for high-quality clinical pathways in oncology. *J Oncol Pract.* 2017; 13:207–210.
41. Schnipper LE, Davidson NE, Wollins DS, Tyne C, Blayney DW, Blum D, Dicker AP, Ganz PA, Hoverman JR, Langdon R, Lyman GH, Meropol NJ, Mulvey T, et al. American Society of Clinical Oncology statement: A conceptual framework to assess the value of cancer treatment options. *J Am Coll Surg.* 2015; 33:2563–2577.
42. Medicine Io. Delivering high-quality cancer care: charting a new course for a system in crisis. In: Levit L, Balogh E, Nass S, Ganz PA, eds. (Washington, DC: National Academics Press). 2013. <https://doi.org/10.17226/18359>.
43. Cherny NI, Sullivan R, Dafni U, Kerst JM, Sobrero A, Zielinski C, de Vries EG, Piccart MJ. A standardised, generic, validated approach to stratify the magnitude of clinical benefit that can be anticipated from anti-cancer therapies: the European Society for Medical Oncology Magnitude of Clinical Benefit Scale (ESMO-MCBS). *Ann Oncol.* 2015; 26:1547–1573.
44. Network NCC. NCCN clinical practice guidelines in oncology with NCCN evidence blocks. <http://www.nccn.org/evidenceblocks/>.
45. Schnipper LE, Davidson NE, Wollins DS, Blayney DW, Dicker AP, Ganz PA, Hoverman JR, Langdon R, Lyman GH, Meropol NJ, Mulvey T, Newcomer L, Peppercorn J, et al. Updating the American Society of Clinical Oncology value framework: Revisions and reflections in response to comments received. *J Clin Oncol.* 2016; 34:2925–2934.
46. Collins FS, Hamburg MA. First FDA authorization for next-generation sequencer. *N Engl J Med.* 2013; 369:2369–2371.
47. Wetterstrand K. DNA sequencing costs: data from the NHGRI (National Human Genome Research Institute) large-scale genome sequencing program. Large-Scale Genome Sequencing and Analysis Centers. 2016. <https://www.genome.gov/27565109/the-cost-of-sequencing-a-human-genome/>.
48. Bodi K, Perera AG, Adams PS, Bintzler D, Dewar K, Grove DS, Kieleczawa J, Lyons RH, Neubert TA, Noll AC, Singh S, Steen R, Zianni M. Comparison of commercially available target enrichment methods for next-generation sequencing. *J Biomol Tech.* 2013; 24:73–86.
49. Gray PN, Dunlop CL, Elliott AM. Not all next generation sequencing diagnostics are created equal: Understanding the nuances of solid tumor assay design for somatic mutation detection. *Cancers (Basel).* 2015; 7:1313–1332.
50. Frampton GM, Fichtenholtz A, Otto GA, Wang K, Downing SR, He J, Schnall-Levin M, White J, Sanford EM, An P, Sun J, Juhn F, Brennan K, et al. Development and validation of a clinical cancer genomic profiling test based on massively parallel DNA sequencing. *Nat Biotechnol.* 2013; 31:1023–1031.
51. Herzog TJ, Spetzler D, Xiao N, Burnett K, Maney T, Voss A, Reddy S, Burger R, Krivak T, Powell M, Friedlander M, McGuire W. Impact of molecular profiling on overall survival of patients with advanced ovarian cancer. *Oncotarget.* 2016; 7:19840–19849. <https://doi.org/10.18632/oncotarget.7835>.
52. Laes JF, Sauvage S, Ghitti G. Tumor-biopsy stratification based on mTOR-pathway activity and functional mutations in the upstream genes PIK3CA and PTEN. *Oncotarget.* 2017; 8:84426–84433. <https://doi.org/10.18632/oncotarget.21348>.
53. Radovich M, Kiel PJ, Nance SM, Niland EE, Parsley ME, Ferguson ME, Jiang G, Ammakkanavar NR, Einhorn LH, Cheng L, Nassiri M, Davidson DD, Rushing DA, et al. Clinical benefit of a precision medicine based approach for guiding treatment of refractory cancers. *Oncotarget.* 2016; 7:56491–56500. <https://doi.org/10.18632/oncotarget.10606>.
54. Robinson DR, Wu YM, Lonigro RJ, Vats P, Cobain E, Everett J, Cao X, Rabban E, Kumar-Sinha C, Raymond V, Schuetze S, Alva A, Siddiqui J, et al. Integrative clinical genomics of metastatic cancer. *Nature.* 2017; 548:297–303.
55. Roychowdhury S, Iyer MK, Robinson DR, Lonigro RJ, Wu YM, Cao X, Kalyana-Sundaram S, Sam L, Balbin OA, Quist MJ, Barrette T, Everett J, Siddiqui J, et al. Personalized oncology through integrative high-throughput sequencing: a pilot study. *Sci Transl Med.* 2011; 3:111ra121.
56. Von Hoff DD, Stephenson JJ, Rosen P, Loesch DM, Borad MJ, Anthony S, Jameson G, Brown S, Cantafio N, Richards DA, Fitch TR, Wasserman E, Fernandez C, et al. Pilot study using molecular profiling of patients' tumors to find potential targets and select treatments for their refractory cancers. *J Clin Oncol.* 2010; 28:4877–4883.
57. Weiss GJ, Hoff BR, Whitehead RP, Sangal A, Gingrich SA, Penny RJ, Mallery DW, Morris SM, Thompson EJ, Loesch DM, Khemka V. Evaluation and comparison of two commercially available targeted next-generation sequencing platforms to assist oncology decision making. *Onco Targets Ther.* 2015; 8:959–967.
58. Foundation Medicine Inc. FoundationOne - Foundation Medicine. <https://www.foundationmedicine.com/genomic-testing/foundation-one>. Accessed November 13, 2017.
59. Caris Life Sciences. Caris Molecular Intelligence CGP+. <https://www.carismoleculairintelligence.com/cgpplus/>. Accessed November 13, 2017.
60. OncoDNA S.A. OncoDEEP - Solution combining DNA and protein analysis of a solid biopsy. <https://www.oncodna.com/en/solution/oncodeep/>. Accessed November 13, 2017.



61. Tempus Labs Inc. Tempus. <https://www.tempus.com/providers.html>. Accessed November 13, 2017.
62. Paradigm Diagnostics Inc. Physician FAQ - Paradigm. <http://www.paradigmdx.com/pcdx/physician-faq/>. Accessed November 13, 2017.
63. Thermo Fisher Scientific Inc. OncoPrint Dx Target Test - Thermo Fisher Scientific. <https://www.thermofisher.com/order/catalog/product/A32451>. Accessed November 13, 2017.
64. Quest Diagnostics Inc. OncoVantage Solid Tumor Mutation Analysis - Quest Diagnostics. [http://www.questdiagnostics.com/testcenter/testguide.action?dc=TS\\_OncoVantage](http://www.questdiagnostics.com/testcenter/testguide.action?dc=TS_OncoVantage). Accessed November 13, 2017.
65. Quest Diagnostics Inc. OncoVantage. <https://education.questdiagnostics.com/faq/FAQ155>. Accessed November 13, 2017.
66. OncoDNA S.A. OncoSTRAT&GO, Solution integrating analysis of solid and liquid biopsy. <https://www.oncodna.com/en/solution/oncostratgo/>. Accessed November 13, 2017.
67. Ambry Genetics Corp. TumorNext-HRD Genetic Testing - Clinician - Ambry Genetics. <https://www.ambrygen.com/clinician/genetic-testing/16/oncology/tumornext-hrd>. Accessed November 13, 2017.
68. American Society of Clinical Oncology. Participating Centers - TAPUR. <https://www.tapur.org/participating-centers>. Accessed November 13, 2017.
69. U.S. Food and Drug Administration. *In Vitro* Diagnostics > List of Cleared or Approved Companion Diagnostic Devices (*In Vitro* and Imaging Tools). <https://www.fda.gov/MedicalDevices/ProductsandMedicalProcedures/InVitroDiagnostics/ucm301431.htm>. Accessed November 13, 2017.
70. Sboner A, Mu XJ, Greenbaum D, Auerbach RK, Gerstein MB. The real cost of sequencing: higher than you think! *Genome Biol.* 2011; 12:125.
71. Frank M, Prenzler A, Eils R, Graf von der Schulenburg JM. Genome sequencing: a systematic review of health economic evidence. *Health Econ Rev.* 2013; 3:29.
72. Canadian Agency for Drugs and Technologies in Health. Next generation DNA sequencing: A review of the cost effectiveness and guidelines. CADTH Rapid Response Reports. <https://cadth.ca/next-generation-dna-sequencing-review-cost-effectiveness-and-guidelines>. 2014.
73. Li Y, Bare LA, Bender RA, Sninsky JJ, Wilson LS, Devlin JJ, Waldman FM. Cost effectiveness of sequencing 34 cancer-associated genes as an aid for treatment selection in patients with metastatic melanoma. *Mol Diagn Ther.* 2015; 19:169–177.
74. Gallego CJ, Shirts BH, Bennette CS, Guzauskas G, Amendola LM, Horike-Pyne M, Hisama FM, Pritchard CC, Grady WM, Burke W, Jarvik GP, Veenstra DL. Next-generation sequencing panels for the diagnosis of colorectal cancer and polyposis syndromes: A cost-effectiveness analysis. *J Clin Oncol.* 2015; 33:2084–2091.
75. Bennette CS, Gallego CJ, Burke W, Jarvik GP, Veenstra DL. The cost-effectiveness of returning incidental findings from next-generation genomic sequencing. *Genet Med.* 2015; 17:587–595.
76. Sabatini LM, Mathews C, Ptak D, Doshi S, Tynan K, Hegde MR, Burke TL, Bossler AD. Genomic sequencing procedure microcosting analysis and health economic cost-impact analysis: A report of the association for molecular pathology *J Mol Diagn.* 2016; 18:319–328.
77. van Amerongen RA, Retèl VP, Coupé VM, Nederlof PM, Vogel MJ, van Harten WH. Next-generation sequencing in NSCLC and melanoma patients: a cost and budget impact analysis. *Ecancermedicallscience.* 2016; 10:684.
78. Haslem DS, Van Norman SB, Fulde G, Knighton AJ, Belnap T, Butler AM, Rhagunath S, Newman D, Gilbert H, Tudor BP, Lin K, Stone GR, Loughmiller DL, et al. A retrospective analysis of precision medicine outcomes in patients with advanced cancer reveals improved progression-free survival without increased health care costs. *J Oncol Pract.* 2016. <https://doi.org/10.1200/JOP.2016.011486>.
79. Costa S, Regier DA, Meissner B, Cromwell I, Ben-Neriah S, Chavez E, Hung S, Steidl C, Scott DW, Marra MA, Peacock SJ, Connors JM. A time-and-motion approach to micro-costing of high-throughput genomic assays. *Curr Oncol.* 2016; 23:304–313.
80. Doble B, John T, Thomas D, Fellowes A, Fox S, Lorgelly P. Cost-effectiveness of precision medicine in the fourth-line treatment of metastatic lung adenocarcinoma: An early decision analytic model of multiplex targeted sequencing. *Lung Cancer.* 2017; 107:22–35.
81. Ree AH, Russnes HG, Heinrich D, Dueland S, Boye K, Nygaard V, Silwal-Pandit L, Østrup O, Hovig E, Nygaard V, Rødland EA, Nakken S, Øien JT, et al. Implementing precision cancer medicine in the public health services of Norway: The diagnostic infrastructure and a cost estimate. *ESMO Open.* 2017; 2:e000158.
82. Plöthner M, Frank M, von der Schulenburg JG. Cost analysis of whole genome sequencing in German clinical practice. *Eur J Health Econ.* 2017; 18:623–633.
83. Weymann D, Laskin J, Roscoe R, Schrader KA, Chia S, Yip S, Cheung WY, Gelmon KA, Karsan A, Renouf DJ, Marra M, Regier DA. The cost and cost trajectory of whole-genome analysis guiding treatment of patients with advanced cancers. *Mol Genet Genomic Med.* 2017; 5:251–260.
84. van Nimwegen KJ, van Soest RA, Veltman JA, Nelen MR, van der Wilt GJ, Vissers LE, Grutters JP. Is the \$1000 genome as near as we think? A cost analysis of next-generation sequencing *Clin Chem.* 2016; 62:1458–1464.
85. Prasad V. Perspective: The precision-oncology illusion. *Nature.* 2016; 537:S63.
86. Subbiah V, Kurzrock R. Debunking the delusion that precision oncology is an illusion. *Oncologist.* 2017; 22:881–882.
87. Dureau S, Ricci F, Alt M, Loirat D, Sablin MP, Kamal M, Bieche I, Armanet S, Delord JP, Goncalves A, Gavaille C, Dubot C, Isambert N, et al. SHIVA: Randomized phase



- II trial comparing molecularly targeted therapy based on tumor molecular profiling versus conventional therapy in patients with refractory cancer-Overall survival (OS) analysis [abstract]. *J Clin Oncol.* 2017; 35:Abstr nr 11515.
88. Le Tourneau C, Delord JP, Gonçalves A, Gavoille C, Dubot C, Isambert N, Campone M, Trédan O, Massiani MA, Mauborgne C, Armanet S, Servant N, Bièche I, et al. Molecularly targeted therapy based on tumour molecular profiling versus conventional therapy for advanced cancer (SHIVA): A multicentre, open-label, proof-of-concept, randomised, controlled phase 2 trial. *Lancet Oncol.* 2015; 16:1324–1334.
  89. Schwartzberg L, Kim ES, Liu D, Schrag D. Precision oncology: Who, how, what, when, and when not? *Am Soc Clin Oncol Educ Book.* 2017; 37:160–169.
  90. Féré C, Massard C, Ileana E, Hollebecque A, Lacroix L, Ammari S, Ngo-Camus M, Bahleda R, Gazzah A, Varga A, Postel-Vinay S, Loriot Y, Auger N, et al. Molecular screening for cancer treatment optimization (MOSCATO 01): A prospective molecular triage trial; Interim analysis of 420 patients [abstract]. *Cancer Res.* 2014; 74:Abstr nr CT240.
  91. Harttrampf AC, Lacroix L, Deloger M, Deschamps F, Puget S, Auger N, Vielh P, Varlet P, Balogh Z, Abbou S, Allorant A, Valteau-Couanet D, Sarnacki S, et al. Molecular screening for cancer treatment optimization (MOSCATO-01) in pediatric patients: A single-institutional prospective molecular stratification trial. *Clin Cancer Res.* 2017; 23:6101–6112.
  92. Wheler JJ, Yelensky R, Stephen B, Hong DS, Zinner R, Subbiah V, Fu S, Karp DD, Falchook GS, Naing A, Tsimberidou AM, Piha-Paul SA, Janku F, et al. Prospective study comparing outcomes in patients with advanced malignancies on molecular alteration-matched versus non-matched therapy [abstract]. *J Clin Oncol.* 2015; 33:Abstr 11019.
  93. Henary H, Hong DS, Falchook GS, Tsimberidou A, George GC, Wen S, Wheler J, Fu S, Naing A, Piha-Paul S, Janku F, Kim KB, Hwu P, et al. Melanoma patients in a phase I clinic: Molecular aberrations, targeted therapy and outcomes. *Ann Oncol.* 2013; 24:2158–2165.
  94. Weiss GJ, Liang WS, Demeure MJ, Kiefer JA, Hostetter G, Izatt T, Sinari S, Christoforides A, Aldrich J, Kurdoglu A, Phillips L, Benson H, Reiman R, et al. A pilot study using next-generation sequencing in advanced cancers: Feasibility and challenges. *PLoS One.* 2013; 8:e76438.
  95. Tsimberidou AM, Wen S, Hong DS, Wheler JJ, Falchook GS, Fu S, Piha-Paul S, Naing A, Janku F, Aldape K, Ye Y, Kurzrock R, Berry D. Personalized medicine for patients with advanced cancer in the phase I program at MD Anderson: Validation and landmark analyses. *Clin Cancer Res.* 2014; 20:4827–4836.
  96. Tsimberidou AM, Iskander NG, Hong DS, Wheler JJ, Falchook GS, Fu S, Piha-Paul S, Naing A, Janku F, Luthra R, Ye Y, Wen S, Berry D, et al. Personalized medicine in a phase I clinical trials program: The MD Anderson Cancer Center initiative. *Clin Cancer Res.* 2012; 18:6373–6383.
  97. Kim ES, Herbst RS, Wistuba II, Lee JJ, Blumenschein GR, Tsao A, Stewart DJ, Hicks ME, Erasmus J, Gupta S, Alden CM, Liu S, Tang X, et al. The BATTLE trial: Personalizing therapy for lung cancer. *Cancer Discov.* 2011; 1:44–53.
  98. Janku F, Berry DA, Gong J, Parsons HA, Stewart DJ, Kurzrock R. Outcomes of phase II clinical trials with single-agent therapies in advanced/metastatic non-small cell lung cancer published between 2000 and 2009. *Clin Cancer Res.* 2012; 18:6356–6363.
  99. Jardim DL, Schwaederle M, Wei C, Lee JJ, Hong DS, Eggermont AM, Schilsky RL, Mendelsohn J, Lazar V, Kurzrock R. Impact of a biomarker-based strategy on oncology drug development: A meta-analysis of clinical trials leading to FDA approval. *J Natl Cancer Inst.* 2015; 107:pii: djv253.
  100. Schwaederle M, Zhao M, Lee JJ, Eggermont AM, Schilsky RL, Mendelsohn J, Lazar V, Kurzrock R. Impact of precision medicine in diverse cancers: A meta-analysis of phase II clinical trials. *J Clin Oncol.* 2015; 33:3817–3825.
  101. Schwaederle M, Zhao M, Lee JJ, Lazar V, Leyland-Jones B, Schilsky RL, Mendelsohn J, Kurzrock R. Association of biomarker-based treatment strategies with response rates and progression-free survival in refractory malignant neoplasms: a meta-analysis. *JAMA Oncol.* 2016; 2:1452–1459.
  102. National Comprehensive Cancer Network. NCCN Clinical Practice Guidelines in Oncology (NCCN Guidelines®). Breast Cancer Version 3.2017. 2017. [https://www.nccn.org/professionals/physician\\_gls/pdf/breast.pdf](https://www.nccn.org/professionals/physician_gls/pdf/breast.pdf). Accessed November 13, 2017.
  103. Albanell J, Gonzalez A, Gonzalez-Angulo AM, Eterovic AK, Martinez-De Duenas E, Zheng X, Guerrero A, Liu S, Pérez-Carrión R, Chen K, Chacon JI, Mills GB, Novoa SA, et al. Genomic alterations driving breast cancer (BC) metastases and their relationship with the subtype switch in the GEICAM ConvertHER study [abstract]. *J Clin Oncol.* 2017; 35:Abstr nr 1017.
  104. Albanell J, Elvin JA, Ali SM, Schrock AB, Chung J, Vergilio J, Suh J, Ramkissoon S, Severson EA, Daniel S, Miller VA, Stephens PJ, Gay LM, et al. BRAF: An emerging target for triple-negative breast cancer [abstract]. *J Clin Oncol.* 2017; 35:Abstr nr 1099.
  105. Basu GD, White T, LoBello JR, Kurdoglu A, Trent JM, Halbert MJ, Royce T, O'Shaughnessy J. Assessment of ESR1 and ERBB2 mutations in estrogen receptor positive (ER+) metastatic breast cancers (MBC) [abstract]. *J Clin Oncol.* 2017; 35:Abstr nr 1040.
  106. Bayani J, Kornaga E, Crozier C, Jang GH, Kalatskaya I, Trinh QM, Yao CQ, Livingstone J, Hasenburger A, Kieback DG, Markopoulos C, Dirix L, Boutros PC, et al. Copy-number and targeted sequencing analyses to identify distinct prognostic groups: Implications for patient selection to targeted therapies amongst anti-endocrine therapy resistant early breast cancers [abstract]. *J Clin Oncol.* 2017; 35:Abstr nr 524.

107. Bayar MA, Criscitiello C, Curigliano G, Symmans WF, Desmedt C, Bonnefoi HR, Sinn BV, Pruneri G, Vicier C, Pierga JY, Denkert C, Loibl S, Sotiriou C, et al. A gene signature of chemo-immunization to predict outcome in patients with triple negative breast cancer treated with neoadjuvant chemotherapy [abstract]. *J Clin Oncol.* 2017; 35:Abstr nr 575.
108. Buechler SA, Badve SS, Gokmen-Polar Y. EarlyR genomic signature to predict pathological complete response following neoadjuvant anthracycline-taxane chemotherapy in estrogen-receptor positive (ER+) breast cancer [abstract]. *J Clin Oncol.* 2017; 35:Abstr nr 579.
109. Drago JZ, Niemierko A, Spring L, Moy B, Juric D, Isakoff SJ, Iafrate AJ, Ellisen LW, Bardia A. FGFR gene amplification and response to endocrine therapy in metastatic hormone receptor positive (HR+) breast cancer [abstract]. *J Clin Oncol.* 2017; 35:Abstr nr 1013.
110. Spring L, Niemierko A, Juric D, Zangardi M, Abraham E, Dias-Santagata D, Ellisen LW, Isakoff SJ, Iafrate AJ, Moy B, Bardia A. Tumor genomics and response to CDK 4/6 inhibitors for patients with hormone receptor-positive (HR+) metastatic breast cancer (MBC) [abstract]. *J Clin Oncol.* 2017; 35:Abstr nr 1046.
111. National Comprehensive Cancer Network. NCCN Clinical Practice Guidelines in Oncology (NCCN Guidelines®). Colon Cancer Version 2.2017. 2017. [https://www.nccn.org/professionals/physician\\_gls/pdf/colon.pdf](https://www.nccn.org/professionals/physician_gls/pdf/colon.pdf). Accessed November 13, 2017.
112. Miyamoto Y, Stintzing S, Heinemann V, Zhang W, Cao S, Okazaki S, Berger MD, Suenaga M, Schirripa M, Soni S, Matsusaka S, Ning Y, Yang D, et al. Association of genetic variations in genes implicated in the axis with outcome in patients (pts) with metastatic colorectal cancer (mCRC) treated with cetuximab plus chemotherapy [abstract]. *J Clin Oncol.* 2017; 35:Abstr nr 3585.
113. Suenaga M, Cao S, Stintzing S, Zhang W, Yang D, Ning Y, Okazaki S, Berger MD, Miyamoto Y, Schirripa M, Gopez R, Melendez E, Soni S, et al. Genetic polymorphisms of CCL5 and CCR5 to predict efficacy of cetuximab-based treatment in metastatic colorectal cancer patients depending on primary tumor location [abstract]. *J Clin Oncol.* 2017; 35:Abstr nr 3594.
114. Yaeger R, Chatila W, Lipsyc M, Sanchez-Vega F, Hechtman JF, Cercek A, Stadler ZK, Middha S, Kundra R, Syed A, Zehir A, Varghese AM, Segal NH, et al. Variability in genomic alterations between right- and left-sided microsatellite stable (MSS) metastatic colorectal cancer and impact on survival [abstract]. *J Clin Oncol.* 2017; 35:Abstr nr 3534.
115. National Comprehensive Cancer Network. NCCN Clinical Practice Guidelines in Oncology (NCCN Guidelines®). Rectal Cancer Version 3.2017. 2017. [https://www.nccn.org/professionals/physician\\_gls/pdf/rectal.pdf](https://www.nccn.org/professionals/physician_gls/pdf/rectal.pdf). Accessed November 13, 2017.
116. Choi YY, Kim H, Yang HK, Kim WH, Kim YW, Kook MC, Park YK, Kim HH, Lee HS, Lee KH, Gu MJ, Choi SH, Hong SW, et al. Clinical impact of microsatellite instability in patients with stage II and III gastric cancer: Results from the CLASSIC trial [abstract]. *J Clin Oncol.* 2017; 35:Abstr nr 4022.
117. Iqbal S, McDonough S, Lenz HJ, Ilson DH, Burtness B, Nangia CS, Barzi A, Schneider C, Liu J, Dotan E, Guthrie KA, Hochster HS. A randomized phase II pilot study prospectively evaluating treatment for patients based on ERCC1 for advanced/ metastatic esophageal, gastric, or gastroesophageal junction cancer: SWOG S1201 [abstract]. *J Clin Oncol.* 2017; 35:Abstr nr 4009.
118. Kawazoe A, Shitara K, Kuboki Y, Bando H, Kojima T, Yoshino T, Ohtsu A, Ochiai A, Togashi Y, Nishikawa H, Doi T, Kuwata T. Clinicopathological features of program death ligand-1 expression with mismatch repair, Epstein-Barr virus status, and cancer genome alterations in metastatic gastric cancer [abstract]. *J Clin Oncol.* 2017; 35:Abstr nr 4040.
119. Ku GY, Sanchez-Vega F, Chatila W, Margolis M, Fein C, Ilson DH, Hechtman JF, Tuvy Y, Bouvier N, Kundra R, Shia J, Heins ZJ, Middha S, et al. Correlation of benefit from immune checkpoint inhibitors with next gen sequencing (NGS) profiles in esophagogastric cancer (EGC) patients [abstract]. *J Clin Oncol.* 2017; 35:Abstr nr 4025.
120. Lee J, Kim ST, Mortimer PG, Hollingsworth SJ, Harrington EA, Shepherd C, Kilgour E, Park SH, Lee H, Oh SY, Kang JH, Park JO, Park YS, et al. VIKTORY trial: Report on AZD1775/paclitaxel in TP53 mutation (+) GC, selumetinib/paclitaxel in ras aberrant GC, AZD5363/paclitaxel in PIK3CA mt and biomarker negative, savolitinib/docetaxel in met (+), and vistusertib/paclitaxel in RICTOR(+) GC [abstract]. *J Clin Oncol.* 2017; 35:Abstr nr 4024.
121. National Comprehensive Cancer Network. NCCN Clinical Practice Guidelines in Oncology (NCCN Guidelines®). Gastric Cancer Version 5.2017. 2017. [https://www.nccn.org/professionals/physician\\_gls/pdf/gastric.pdf](https://www.nccn.org/professionals/physician_gls/pdf/gastric.pdf). Accessed November 13, 2017.
122. National Comprehensive Cancer Network. NCCN Clinical Practice Guidelines in Oncology (NCCN Guidelines®). Esophageal and Esophagogastric Junction Cancers Version 4.2017. 2017. [https://www.nccn.org/professionals/physician\\_gls/pdf/esophageal.pdf](https://www.nccn.org/professionals/physician_gls/pdf/esophageal.pdf). Accessed November 13, 2017.
123. National Comprehensive Cancer Network. NCCN Clinical Practice Guidelines in Oncology (NCCN Guidelines®). Hepatobiliary Cancers Version 4.2017. 2017. [https://www.nccn.org/professionals/physician\\_gls/pdf/hepatobiliary.pdf](https://www.nccn.org/professionals/physician_gls/pdf/hepatobiliary.pdf). Accessed November 13, 2017.
124. Lowery MA, Jordan E, Kemel Y, Mukherjee S, Cercek A, Kemeny NE, Varghese AM, Rusek M, Boucher TM, Mandelker D, Berger MF, Ptashkin R, Hyman DM, et al. A prospective analysis of germline alterations (GA) in biliary tract cancer (BTC) [abstract]. *J Clin Oncol.* 2017; 35:Abstr nr 4085.

125. Kim RD, McDonough SL, El-Khoueiry AB, Bekaii-Saab TS, Stein S, Sahai V, Keogh GP, Kim EJ, Baron AD, Siegel AB, Barzi A, Guthrie K, Javle MM, et al. SWOG S1310: Randomized phase II trial of single agent MEK inhibitor trametinib vs. 5-fluorouracil or capecitabine in refractory advanced biliary cancer [abstract]. *J Clin Oncol.* 2017; 35:Abstr nr 4016.
126. Soria JC, Strickler JH, Govindan R, Chai S, Chan N, Quiroga-Garcia V, Bahleda R, Hierro C, Zhong B, Gonzalez M, Santiago-Walker AE, Parekh TV, Luo FR, et al. Safety and activity of the pan-fibroblast growth factor receptor (FGFR) inhibitor erdafitinib in phase 1 study patients (Pts) with molecularly selected advanced cholangiocarcinoma (CCA) [abstract]. *J Clin Oncol.* 2017; 35:Abstr nr 4074.
127. Teufel M, Köchert K, Meinhardt G, Bruix J. Efficacy of regorafenib (REG) in patients with hepatocellular carcinoma (HCC) in the phase III RESORCE trial according to alpha-fetoprotein (AFP) and c-Met levels as predictors of poor prognosis [abstract]. *J Clin Oncol.* 2017; 35:Abstr nr 4078.
128. Goldstein JB, Zhao L, Javle MM, Overman MJ, Shroff RT, Varadhachary GR, Wolff RA, Futreal PA, Fogelman DR. Characterization of germline genomic alterations in familial pancreas cancer [abstract]. *J Clin Oncol.* 2017; 35:Abstr nr 4116.
129. Jordan E, Lowery MA, Wong W, Kemel Y, Mukherjee S, Ravichandran V, Basturk O, Yu KH, Iacobuzio-Donahue C, Lincoln A, Varghese AM, Abou-Alfa GK, Leach SD, et al. Prospective assessment for pathogenic germline alterations (PGA) in pancreas cancer (PAC) [abstract]. *J Clin Oncol.* 2017; 35:Abstr nr 4102.
130. National Comprehensive Cancer Network. NCCN Clinical Practice Guidelines in Oncology (NCCN Guidelines®). Pancreatic Adenocarcinoma Version 3.2017. 2017. [https://www.nccn.org/professionals/physician\\_gls/pdf/pancreatic.pdf](https://www.nccn.org/professionals/physician_gls/pdf/pancreatic.pdf). Accessed November 13, 2017.
131. National Comprehensive Cancer Network. NCCN Clinical Practice Guidelines in Oncology (NCCN Guidelines®). Ovarian Cancer Version 4.2017. 2017. [https://www.nccn.org/professionals/physician\\_gls/pdf/ovarian.pdf](https://www.nccn.org/professionals/physician_gls/pdf/ovarian.pdf). Accessed November 13, 2017.
132. Aghajanian C, DeLair D, Grisham RN, Hensley ML, Konner JA, Makker V, O'Carbhaill RE, Sabbatini P, Soumerai T, Charen AS, Spriggs DR, Soslow RA, Tew WP, et al. Somatic mutations in homologous recombination pathway genes in ovarian cancer [abstract]. *J Clin Oncol.* 2017; 35:Abstr nr 5545.
133. Da Costa AA, Salvadori MM, Valadares CV, Stecca C, Brot L, do Canto LM, Baiocchi G, Rogatto SR, Achatz MIW. Homologous recombination deficiency and platinum rechallenge in platinum-resistant ovarian cancer patients [abstract]. *J Clin Oncol.* 2017; 35:Abstr nr 5576.
134. Elvin JA, He Y, Sun J, Odunsi K, Szender JB, Moore KN, Gay LM, Frampton GM, Vergilio JA, Suh J, Ramkissoon S, Severson EA, Daniel S, et al. Comprehensive genomic profiling (CGP) with loss of heterozygosity (LOH) to identify therapeutically relevant subsets of ovarian cancer (OC) [abstract]. *J Clin Oncol.* 2017; 35:Abstr nr 5512.
135. Fleming GF, Emens LA, Eder JP, Hamilton EP, Liu JF, Liu B, Molinero L, Fasso M, O'Hear C, Braiteh FS. Clinical activity, safety and biomarker results from a phase Ia study of atezolizumab (atezo) in advanced/recurrent endometrial cancer (rEC) [abstract]. *J Clin Oncol.* 2017; 35:Abstr nr 5585.
136. Freixinos VR, Ruiz-Pace F, Fariñas-Madrid L, Castro ACG, Villacampa G, Nuciforo P, Vivancos A, Dienstmann R, Oaknin A. Impact of genomic heterogeneity on PI3K/AKT/mTOR inhibitors (PAMi) efficacy in gynecologic cancer (GYN) patients (pts) [abstract]. *J Clin Oncol.* 2017; 35:Abstr nr 5569.
137. Miller EM, Patterson NE, Karabakhtsian RG, Bejerano-Sagie M, Ravi N, Maslov A, Quispe-Tintaya W, Wang T, Lin J, Smith HO, Kuo DY, Goldberg GL, Montagna C. Assessment of a custom designed next generation DNA sequencing gene panel to profile endometrial cancers [abstract]. *J Clin Oncol.* 2017; 35:Abstr nr 5593.
138. Roszik J, Qin Y, Ekmekcioglu S, Forget MA, Hwu P, Grimm EA, Jazaeri AA. The neoantigen landscape and immune regulators in cervical cancer [abstract]. *J Clin Oncol.* 2017; 35:Abstr nr 5528.
139. Schellens JHM, Marabelle A, Zeigenfuss S, Ding J, Pruitt SK, Chung HC. Pembrolizumab for previously treated advanced cervical squamous cell cancer: Preliminary results from the phase 2 KEYNOTE-158 study [abstract]. *J Clin Oncol.* 2017; 35:Abstr nr 5514.
140. Tawfik C, Kim B, Londono A, Katre AA, Della Manna DL, Huh WK, Yang ES, Bevis KS, Straughn JM, Leath CA, Arend RC. High-intermediate risk endometrial cancer: Can gene expression predict recurrence? [abstract]. *J Clin Oncol.* 2017; 35:Abstr nr 5591.
141. Yates MS, Timms K, Daniels MS, Oakley HD, Munsell MF, Lanchbury JS, Lu KH. Evaluation of BRCA1/2 and homologous recombination defects in ovarian cancer and impact on clinical outcomes [abstract]. *J Clin Oncol.* 2017; 35:Abstr nr 5511.
142. National Comprehensive Cancer Network. NCCN Clinical Practice Guidelines in Oncology (NCCN Guidelines®). Cervical Cancer Version 1.2018. 2017. [https://www.nccn.org/professionals/physician\\_gls/pdf/cervical.pdf](https://www.nccn.org/professionals/physician_gls/pdf/cervical.pdf). Accessed November 13, 2017.
143. National Comprehensive Cancer Network. NCCN Clinical Practice Guidelines in Oncology (NCCN Guidelines®). Uterine Neoplasms Version 1.2018. 2017. [https://www.nccn.org/professionals/physician\\_gls/pdf/uterine.pdf](https://www.nccn.org/professionals/physician_gls/pdf/uterine.pdf). Accessed November 13, 2017.
144. National Comprehensive Cancer Network. NCCN Clinical Practice Guidelines in Oncology (NCCN Guidelines®). Prostate Cancer Version 2.2017. 2017. [https://www.nccn.org/professionals/physician\\_gls/pdf/prostate.pdf](https://www.nccn.org/professionals/physician_gls/pdf/prostate.pdf). Accessed November 13, 2017.
145. Aparicio A, Xiao L, Tapia ELN, Hoang A, Ramesh N, Wu W, Chancoco H, Heath EI, Efsthathiou E, Thompson TC,



- Troncoso P, Broom BM, Zurita AJ, et al. The aggressive variant prostate carcinoma (AVPC) molecular signature (-MS) and platinum-sensitivity in castration resistant prostate cancer (CRPC) [abstract]. *J Clin Oncol.* 2017; 35:Abstr nr 5013.
146. Boudadi K, Suzman DL, Luber B, Wang H, Silberstein J, Sullivan R, Dowling D, Harb R, Nirschl T, Dittamore RV, Carducci MA, Eisenberger MA, Haffner M, et al. Phase 2 biomarker-driven study of ipilimumab plus nivolumab (Ipi/Nivo) for ARV7-positive metastatic castrate-resistant prostate cancer (mCRPC) [abstract]. *J Clin Oncol.* 2017; 35:Abstr nr 5035.
147. Cheng ML, Abida W, Rathkopf DE, Arcila ME, Barron D, Autio KA, Zehir A, Danila DC, Morris MJ, Gopalan A, Reuter VE, Kantoff PW, Slovin SF, et al. Next-generation sequencing (NGS) of tissue and cell free DNA (cfDNA) to identify somatic and germline alterations in advanced prostate cancer [abstract]. *J Clin Oncol.* 2017; 35:Abstr nr 5010.
148. Febbo PG, Crager M, Burke E, Lawrence HJ, Cullen J, Klein EA. Association of risk of clinical recurrence (CR) and prostate cancer death (PCD) with a 17-gene genomic prostate score (GPS) value <20 [abstract]. *J Clin Oncol.* 2017; 35:Abstr nr 5074.
149. Hearn JWD, Xie W, Nakabayashi M, Almassi N, Reichard CA, Pomerantz M, Kantoff PW, Sharifi N. HSD3B1 genotype and response to androgen deprivation therapy for biochemical recurrence after radiotherapy for localized prostate cancer [abstract]. *J Clin Oncol.* 2017; 35:Abstr nr 5050.
150. Kohli M, Wang L, Dehm S, Hillman DW, Sicotte H, Gormley M, Bhargava V, Li W, Tan W, Pitot HC, Ho TH, Costello BA, Bryce AH, et al. Genome-wide analysis of metastases to reveal association of pathway activation with abiraterone acetate/prednisone (AA/P) primary resistance and cell cycle proliferation pathway activation with response duration in metastatic castrate resistant prostate cancer (mCRPC) [abstract]. *J Clin Oncol.* 2017; 35:Abstr nr 5053.
151. Subudhi SK, Aparicio A, Troncoso P, Zhang J, Gumbs C, Wu CJ, Gao J, Vence LM, Blando JM, Corn PG, Araujo JC, Zurita AJ, Prokhorova IN, et al. Linking tumor mutational load to clinical responses to ipilimumab (IPI) in men with advanced prostate cancer (PCa) [abstract]. *J Clin Oncol.* 2017; 35:Abstr nr 5065.
152. Sweeney C, Gerke T, Beltran H, Sboner A, Karnes RJ, Klein EA, Davicioni E, Yousefi K, Ross A, Mucci L, Trock BJ. Association of loss of tumor suppressor ZFP36 with lethal prostate cancer [abstract]. *J Clin Oncol.* 2017; 35:Abstr nr 5062.
153. National Comprehensive Cancer Network. NCCN Clinical Practice Guidelines in Oncology (NCCN Guidelines®). Kidney Cancer Version 12018. 2017. [https://www.nccn.org/professionals/physician\\_gls/pdf/kidney.pdf](https://www.nccn.org/professionals/physician_gls/pdf/kidney.pdf). Accessed November 13, 2017.
154. National Comprehensive Cancer Network. NCCN Clinical Practice Guidelines in Oncology (NCCN Guidelines®). Testicular Cancer Version 22017. 2017. [https://www.nccn.org/professionals/physician\\_gls/pdf/testicular.pdf](https://www.nccn.org/professionals/physician_gls/pdf/testicular.pdf). Accessed November 13, 2017.
155. National Comprehensive Cancer Network. NCCN Clinical Practice Guidelines in Oncology (NCCN Guidelines®). Bladder Cancer Version 52017. 2017. [https://www.nccn.org/professionals/physician\\_gls/pdf/bladder.pdf](https://www.nccn.org/professionals/physician_gls/pdf/bladder.pdf). Accessed November 13, 2017.
156. Audenet F, Donoghue M, Pietzak EJ, Isharwal S, Cheng ML, Iyer G, Funt S, Bajorin DF, Al-Ahmadie H, Reuter VE, Eng J, Reichel JB, Arcila ME, et al. Genomic comparison of matched primary and metastatic germ cell tumors (GCT) [abstract]. *J Clin Oncol.* 2017; 35:Abstr nr 4556.
157. Carlo MI, Zhang L, Mandelker D, Vijai J, Cipolla CK, Robson ME, Funt S, Hakimi AA, Iyer G, Rosenberg JE, Coleman J, Solit DB, Offit K, et al. Cancer predisposing germline mutations in patients (pts) with urothelial cancer (UC) of the renal pelvis (R-P), ureter (U) and bladder (B) [abstract]. *J Clin Oncol.* 2017; 35:Abstr nr 4510.
158. Carlo MI, Mukherjee S, Kemel Y, Zhang L, Mandelker D, Vijai J, Coskey DT, Pradhan N, Hyman DM, Hakimi AA, Coleman J, Lee CH, Feldman DR, et al. Discovery and prevalence of cancer-susceptibility germline mutations (Mts) in patients (Pts) with advanced renal cell carcinoma (aRCC) [abstract]. *J Clin Oncol.* 2017; 35:Abstr nr 4524.
159. Escudier BJ, Rini BI, Martini JF, Chang WY, Breza J, Magheli A, Svedman C, Lopatin M, Knezevic D, Goddard AD, English PA, Li R, Lin X, et al. Phase III trial of adjuvant sunitinib in patients with high-risk renal cell carcinoma (RCC): Validation of the 16-gene Recurrence Score in stage III patients [abstract]. *J Clin Oncol.* 2017; 35:Abstr nr 4508.
160. Iyer G, Audenet F, Middha S, Carlo MI, Regazzi AM, Funt S, Al-Ahmadie H, Solit DB, Rosenberg JE, Bajorin DF. Mismatch repair (MMR) detection in urothelial carcinoma (UC) and correlation with immune checkpoint blockade (ICB) response [abstract]. *J Clin Oncol.* 2017; 35:Abstr nr 4511.
161. Koshkin VS, Reynolds J, Elson P, Magi-Galluzzi C, McKenney J, Smith KS, Shadrach B, Isse K, Saunders LR, Hu M, Tendulkar RD, Stephenson AJ, Fergany AF, et al. Molecular profiling of small cell bladder cancer (SCBC) to reveal gene expression determinants of an aggressive phenotype [abstract]. *J Clin Oncol.* 2017; 35:Abstr nr 4529.
162. Joshi M, Grivas P, Ali SM, Hsu J, Vasekar MK, Emamekhoo H, Pal SK, Li SM, Drabick JJ, Yin M. ATM/RB1 mutations to predict shorter overall survival (OS) in bladder cancer [abstract]. *J Clin Oncol.* 2017; 35:Abstr nr 4547.
163. O'Donnell PH, Grivas P, Balar AV, Bellmunt J, Vuky J, Powles T, Plimack ER, Hahn NM, De Wit R, Pang L, Savage MJ, Lunceford JK, Keefe SM, et al. Biomarker findings and mature clinical results from KEYNOTE-052: First-line pembrolizumab (pembro) in cisplatin-ineligible advanced urothelial cancer (UC) [abstract]. *J Clin Oncol.* 2017; 35:Abstr nr 4502.
164. Pal SK, Geynisman DM, Ali SM, Yakirevich E, Stephens P, Ross JS, Miller VA, Chung J, Choueiri TK. Comprehensive



- genomic profiling (CGP) of advanced papillary renal cell carcinoma (PRCC) to reveal distinctions from TCGA dataset [abstract]. *J Clin Oncol.* 2017; 35:Abstr nr 4517.
165. Teo M, Seier K, Ostrovskaya I, Regazzi AM, Kania BE, Moran MM, Cipolla CK, Bluth MJ, Chaim J, Al-Ahmadie H, Solit DB, Funt S, Wolchok JD, et al. DNA damage repair and response (DDR) gene alterations (alt) and response to PD1/PDL1 blockade in platinum-treated metastatic urothelial carcinoma (mUC) [abstract]. *J Clin Oncol.* 2017; 35:Abstr nr 4509.
  166. Voss MH, Kuo F, Chen D, Marker M, Patel P, Redzematovic A, Riaz N, Chan TA, Choueiri TK, Hsieh J, Motzer RJ, Hakimi AA. Integrated biomarker analysis for 412 renal cell cancer (RCC) patients (pts) treated on the phase 3 COMPARZ trial: Correlating common mutation events in PBRM1 and BAP1 with angiogenesis expression signatures and outcomes on tyrosine kinase inhibitor (TKI) therapy [abstract]. *J Clin Oncol.* 2017; 35:Abstr nr 4523.
  167. National Comprehensive Cancer Network. NCCN Clinical Practice Guidelines in Oncology (NCCN Guidelines®). Non-small Cell Lung Cancer Version 12018. 2017. [https://www.nccn.org/professionals/physician\\_gls/pdf/nscl.pdf](https://www.nccn.org/professionals/physician_gls/pdf/nscl.pdf). Accessed November 13, 2017.
  168. National Comprehensive Cancer Network. NCCN Clinical Practice Guidelines in Oncology (NCCN Guidelines®). Small Cell Lung Cancer Version 12018. 2017. [https://www.nccn.org/professionals/physician\\_gls/pdf/sclc.pdf](https://www.nccn.org/professionals/physician_gls/pdf/sclc.pdf). Accessed November 13, 2017.
  169. Awad MM, Leonardi GC, Kravets S, Dahlberg SE, Driilon AE, Noonan S, Camidge DR, Ou SHI, Costa DB, Gadgeel SM, Steuer CE, Forde PM, Zhu VW, et al. Impact of MET inhibitors on survival among patients (pts) with MET exon 14 mutant (METdel14) non-small cell lung cancer (NSCLC) [abstract]. *J Clin Oncol.* 2017; 35:Abstr nr 8511.
  170. Chae YK, Tamragouri K, Chung J, Schrock AB, Kolla B, Ganesan S, Suh J, Velcheti V, Bivona TG, Ross JS, Stephens P, Miller VA, Patel M, et al. Genomic alterations (GA) and tumor mutational burden (TMB) in large cell neuroendocrine carcinoma of lung (L-LCNEC) as compared to small cell lung carcinoma (SCLC) as assessed via comprehensive genomic profiling (CGP) [abstract]. *J Clin Oncol.* 2017; 35:Abstr nr 8517.
  171. Derks J, Leblay N, van Suylen RJ, Thunnissen E, den Bakker M, Groen HJM, Smit EF, Damhuis R, van de Broek E, Chabrier A, Foll M, McKay J, Fernandez-Cuesta L, et al. Genetic subtypes of large cell neuroendocrine carcinoma (LCNEC) to predict response to chemotherapy [abstract]. *J Clin Oncol.* 2017; 35:Abstr nr 9061.
  172. Fan PD, Narzisi G, Jayaprakash A, Venturini E, Robine N, Smibert P, Germer S, Jordan E, Wang L, Jungbluth AA, Spraggon L, Lovly CM, Kris MG, et al. YES1 amplification as a mechanism of acquired resistance (AR) to EGFR tyrosine kinase inhibitors (TKIs) identified by a transposon mutagenesis screen and clinical genomic testing [abstract]. *J Clin Oncol.* 2017; 35:Abstr nr 9043.
  173. Jin Y, Zhang J, Chen M, Shao Y, Shi X, Zhao J, Wu X, Yu X. Novel resistance mechanisms to first-generation EGFR tyrosine kinase inhibitors: A perspective study in NSCLC patients using targeted next generation sequencing [abstract]. *J Clin Oncol.* 2017; 35:Abstr nr e20576.
  174. Kang J, Chen H, Zhou Q, Tu HY, Zhang XC, Jian S, Wang Z, Wang BC, Wu YL, Yang JJ. Primary resistance to ALK inhibitor in ALK-positive non-small-cell lung cancer [abstract]. *J Clin Oncol.* 2017; 35:Abstr nr 9063.
  175. Murakami H, Umemura S, Shinoda M, Shingyoji M, Ogawa Y, Takeda K, Nosaki K, Okamoto N, Aono H, Hara S, Kuyama S, Sato A, Kanaji N, et al. A nationwide genomic screening project for small cell lung cancer in Japan (LC-SCRUM-Japan) [abstract]. *J Clin Oncol.* 2017; 35:Abstr nr 8518.
  176. Skoulidis F, Hellmann MD, Awad MM, Rizvi H, Carter BW, Denning W, Elamin Y, Zhang J, Leonardi GC, Halpenny D, Plodkowski A, Long N, Erasmus JJ, et al. STK11/LKB1 co-mutations to predict for de novo resistance to PD-1/PD-L1 axis blockade in KRAS-mutant lung adenocarcinoma [abstract]. *J Clin Oncol.* 2017; 35:Abstr nr 9016.
  177. Tsao AS, Wistuba II, Xia D, Byers LA, Diao L, Wang J, Papadimitrakopoulou V, Tang X, Lu W, Kadara H, Gumus ZH, Tan Z, Zhang S, et al. Response of germline and somatic smoothed (SMO) mutations in non-small cell lung cancer (NSCLC) to hedgehog inhibitor vismodegib [abstract]. *J Clin Oncol.* 2017; 35:Abstr nr 9062.
  178. Wang C, Xin S, Shi X, Zhao X, Wu K, Zhang L, Zhang X. The correlation between mutation burden and disease free survival in patients with lung adenocarcinomas [abstract]. *J Clin Oncol.* 2017; 35:Abstr nr 8550.
  179. Zhang ML, Kem M, Mooradian M, Eliane JP, Huynh T, Iafrate AJ, Gainor JF, Mino-Kenudson M. Differential expression of immune inhibitory markers in association with HLA class I and the immune microenvironment in resected lung adenocarcinomas [abstract]. *J Clin Oncol.* 2017; 35:Abstr nr 8551.
  180. National Comprehensive Cancer Network. NCCN Clinical Practice Guidelines in Oncology (NCCN Guidelines®). Head and Neck Cancers Version 22017. 2017. [https://www.nccn.org/professionals/physician\\_gls/pdf/head-and-neck.pdf](https://www.nccn.org/professionals/physician_gls/pdf/head-and-neck.pdf). Accessed November 13, 2017.
  181. Baste N, Dienstmann R, Brana I, Viaplana C, Jimenez J, Ruiz-Pace F, Bescos C, Lorente J, Giralt J, Alberola M, Nuciforo P, Vivancos A, Del Campo JM, et al. Impact of early trials in molecularly-characterized patients (pts) with head and neck cancer (HNC) [abstract]. *J Clin Oncol.* 2017; 35:Abstr nr 6031.
  182. Chen WS, Bindra R, Mo A, Hayman T, Husain Z, Contessa JN, Gaffney SG, Townsend JP, Yu JB. CDKN2A copy number loss in HPV- and HPV+ head and neck cancer to indicate poor prognosis: An integrated genomic and clinical TCGA analysis [abstract]. *J Clin Oncol.* 2017; 35:Abstr nr 6060.

183. Even C, Lassen UN, Merchan JR, Le Tourneau C, Soria JC, Ferte C, Diener JT, Yuen E, Smith C, Oakley GJ, Benhadji KA, Massard C. Notch pathway inhibition with LY3039478 in adenoid cystic carcinoma (ACC) [abstract]. *J Clin Oncol.* 2017; 35:Abstr nr 6024.
184. Haddad RI, Seiwert TY, Chow LQM, Gupta S, Weiss J, Gluck I, Eder JP, Burtness B, Tahara M, Keam B, Kang H, Muro K, Albright A, et al. Genomic determinants of response to pembrolizumab in head and neck squamous cell carcinoma (HNSCC) [abstract]. *J Clin Oncol.* 2017; 35:Abstr nr 6009.
185. Pai SI, Cohen E, Lin D, Fountzilias G, Kim ES, Mehlhorn H, Baste N, Clayburgh D, Lipworth L, Resteghini C, Shara N, Fujii T, Zhang J, et al. A retrospective cohort study of PD-L1 expression in recurrent and/or metastatic squamous cell carcinoma of the head and neck (SUPREME-HN) [abstract]. *J Clin Oncol.* 2017; 35:Abstr nr 6040.
186. Tinhofer I, Eder T, Kunschak R, Niehr F, Jöhrens K, Keilholz U, Budach V. Comprehensive targeted next-generation sequencing to reveal limited clonal evolution after concurrent chemoradiation in patients with squamous cell carcinoma of the head and neck [abstract]. *J Clin Oncol.* 2017; 35:Abstr nr 6059.
187. Wirth LJ, Burtness B, Mehra R, Bauman JR, Lee J, Smith NMS, Lefranc-Torres A, Westra WH, Bishop JA, Faquin WC, Lin DT, Pai SI. IDO1 as a mechanism of adaptive immune resistance to anti-PD1 monotherapy in HNSCC [abstract]. *J Clin Oncol.* 2017; 35:Abstr nr 6053.
188. National Comprehensive Cancer Network. NCCN Clinical Practice Guidelines in Oncology (NCCN Guidelines®). Melanoma Version 12018. 2017. [https://www.nccn.org/professionals/physician\\_gls/pdf/melanoma.pdf](https://www.nccn.org/professionals/physician_gls/pdf/melanoma.pdf). Accessed November 13, 2017.
189. Ascierto PA, Melero I, Bhatia S, Bono P, Sanborn RE, Lipson EJ, Callahan MK, Gajewski T, Gomez-Roca CA, Hodi FS, Curigliano G, Nyakas M, Preusser M, et al. Initial efficacy of anti-lymphocyte activation gene-3 (anti-LAG-3; BMS-986016) in combination with nivolumab (nivo) in pts with melanoma (MEL) previously treated with anti-PD-1/PD-L1 therapy [abstract]. *J Clin Oncol.* 2017; 35:Abstr nr 9520.
190. Chen WS, Andrews MC, Spencer C, Tawbi HA, Lazar A, Tetzlaff MT, Patel SP, Hwu P, Hwu WJ, Diab A, Glitza IC, Amaria RN, Burton EM, et al. Molecular and immune predictors of response and toxicity to combined CTLA-4 and PD-1 blockade in metastatic melanoma (MM) patients (pts) [abstract]. *J Clin Oncol.* 2017; 35:Abstr nr 9579.
191. Izsak A, Giles KM, Lui KP, Weiss SA, Moran U, Vega-Saenz de Miera E, Stein J, Lee AY, Darvishian F, Shapiro RL, Berman RS, Pavlick AC, Wilson M, et al. Targeting EZH2 in acral lentiginous melanoma (ALM) [abstract]. *J Clin Oncol.* 2017; 35:Abstr nr 9534.
192. Johnson DB, Carlson JA, Elvin JA, Vergilio JA, Suh J, Ramkissoon S, Daniel S, Fabrizio D, Frampton GM, Ali SM, Schrock AB, Cho BC, Gibney GT, et al. Landscape of genomic alterations (GA) and tumor mutational burden (TMB) in different metastatic melanoma (MM) subtypes [abstract]. *J Clin Oncol.* 2017; 35:Abstr nr 9536.
193. Kong Y, Chi Z, Si L, Sheng X, Cui C, Dai J, Ma M, Wu X, Tang H, Yu J, Yan J, Yu H, Xu T, et al. Whole genome and RNA sequencing reveal the distinct genomic landscape of acral melanoma [abstract]. *J Clin Oncol.* 2017; 35:Abstr nr 9589.
194. Da Silva IE, Wang KYX, Wilmott JS, Holst J, Park JJ, Quek C, Wongchenko M, Yan Y, Mann GJ, Carlino MS, Kefford R, Scolyer RA, Yang J, et al. Distinct gene expression, mutational profile and clinical outcomes of V600E and V600K/R BRAF-mutant metastatic melanoma (MM) [abstract]. *J Clin Oncol.* 2017; 35:Abstr nr 9541.
195. National Comprehensive Cancer Network. NCCN Clinical Practice Guidelines in Oncology (NCCN Guidelines®). Soft Tissue Sarcoma Version 12018. 2017. [https://www.nccn.org/professionals/physician\\_gls/pdf/sarcoma.pdf](https://www.nccn.org/professionals/physician_gls/pdf/sarcoma.pdf). Accessed November 13, 2017.
196. Broto JM, Marcilla D, Ramos R, Moura DS, Alvarez R, Hernandez N, Pujol CA, Mayordomo E, Romagosa C, Bague S, Reguero E, Cruz J, Martin FJ, et al. Predictive role of FAS for trabectedin in second lines of advanced soft tissue sarcoma (ASTS): A Spanish group for research on sarcoma (GEIS) study [abstract]. *J Clin Oncol.* 2017; 35:Abstr 11071.
197. Burgess MA, Bolejack V, Van Tine BA, Schuetz S, Hu J, D'Angelo SP, Attia S, Priebat DA, Okuno SH, Riedel RF, Davis LE, Movva S, Reed DR, et al. Multicenter phase II study of pembrolizumab (P) in advanced soft tissue (STS) and bone sarcomas (BS): Final results of SARC028 and biomarker analyses [abstract]. *J Clin Oncol.* 2017; 35:Abstr nr 11008.
198. Italiano A, Khalifa E, Laizet Y, Toulmonde M, Cousin S, Lucchesi C. Genetic landscape of soft-tissue sarcomas: Moving toward personalized medicine [abstract]. *J Clin Oncol.* 2017; 35:Abstr nr 11002.
199. Kelly CM, Bowler TG, D'Angelo SP, Dickson MA, Gounder MM, Keohan ML, Vonya T, Yoon SS, Singer S, DeMatteo RP, Antonescu CR, Zehir A, Ladanyi M, et al. The clinical impact of performing routine next generation sequencing (NGS) in gastrointestinal stromal tumors (GIST) [abstract]. *J Clin Oncol.* 2017; 35:Abstr nr 11010.
200. Komarov Y, Barchuk A, Semenova AI, Semiglazova T, Imianitov E, Iyevleva A, Balduva I, Novik AV, Nehaeva TL, Pipia N, Huhtala H, Ivantsov A, Artemyeva A, et al. NY-ESO-1 antigen expression as a prognostic factor for soft tissue sarcomas [abstract]. *J Clin Oncol.* 2017; 35:Abstr nr 11075.
201. Wang J, Bao H, Xu H, Shek TWH, Wu X, Tang Q, Zhang H, Han A, Yin J, Zou C, Wang Y, Huang G, Batalha S, et al. The genomic and evolutionary landscape of osteosarcoma progression and lung metastasis [abstract]. *J Clin Oncol.* 2017; 35:Abstr nr 11029.
202. Wang D, Wang J, Niu X, Huang Z, Wang Z, Zhang Q, Duan J, Bai H, Hao L. Clone evolution and genomic alteration analysis of osteosarcoma and matched lung metastasis [abstract]. *J Clin Oncol.* 2017; 35:Abstr 11032.

203. Wu SP, Cooper BT, Bu F, Bowman CJ, Killian JK, Serrano J, Wang S, Jackson TM, Gorovets D, Shukla N, Meyers PA, Pisapia DJ, Gorlick R, et al. DNA methylation-based classifier for accurate molecular diagnosis of bone sarcomas *JCO Precision Oncology*. 2017. <https://doi.org/10.1200/PO.1217.00031>.
204. Xiu J, Bulbul A, Rashad S. Potential therapeutic genomic alterations in desmoplastic small round blue cell tumor. *J Clin Oncol*. 2017; 35:Abstr nr 11066.
205. National Comprehensive Cancer Network. NCCN Clinical Practice Guidelines in Oncology (NCCN Guidelines®). Central Nervous System Cancers Version 12017. 2017. [https://www.nccn.org/professionals/physician\\_gls/pdf/cns.pdf](https://www.nccn.org/professionals/physician_gls/pdf/cns.pdf). Accessed November 13, 2017.
206. Bagley SJ, Velu P, Bigdeli A, Hess P, Desai AS, Linette GP, Nasrallah M, O'Rourke DM, Brem S, Morrisette JJ. Use of targeted next generation sequencing (NGS) to assess mutational load in glioblastoma (GBM) [abstract]. *J Clin Oncol*. 2017; 35:Abstr nr 2027.
207. Becker AP, Bell EH, Fleming J, McElroy JP, Fabian D, Beyer S, Salavaggione AL, Graham MK, Heaphy CM, Oehlke O, Staszewski O, Prinz M, Grosu A, et al. Comprehensive assessment of ATRX mutation, protein expression, and alternative lengthening of telomeres (ALT) phenotype in grade II and III gliomas [abstract]. *J Clin Oncol*. 2017; 35:Abstr nr 2064.
208. Brahm CG, Walenkamp AME, Van Linde ME, Verheul HMW, Fehrmann RSN. Identification of novel therapeutic targets in glioblastoma with functional genomic mRNA profiling [abstract]. *J Clin Oncol*. 2017; 35:Abstr 2018.
209. Juratli TA, Thiede C, Krex D, Brastianos PK, Wakimoto H, Schackert G, Kirsch M, Cahill DP. TERT promoter mutations in progressive treatment-resistant meningiomas [abstract]. *J Clin Oncol*. 2017; 35:Abstr nr 2047.
210. Oyan B, Eren S, Sonmez O, Ozkan F, Yaltrak K, Ture U. PD-L1 expression of high grade glial tumors at diagnosis and change of expression status at recurrence [abstract]. *J Clin Oncol*. 2017; 35:Abstr nr 2035.
211. Subramaniam DS, Xiu J, Mehta S, Gatalica Z, Swensen J, Sanai N, Heimberger AB. RNA-Seq analysis of glioma tumors to reveal targetable gene fusions [abstract]. *J Clin Oncol*. 2017; 35:Abstr nr 2019.
212. Thomas RP, Nagpal S, Iv M, Soltys SG, Recht CK, Bertrand S, Makar SM, Corbin Z, Mandic K, Coffey G, Pelpola S, Prado IP, Brown M, et al. Association of SDF1 inhibition with local control and relative cerebral blood volume of glioblastoma [abstract]. *J Clin Oncol*. 2017; 35:Abstr nr 2058.
213. Ocana A, Ethier JL, Díez-González L, Corrales-Sánchez V, Srikanthan A, Gascón-Escribano MJ, Templeton AJ, Vera-Badillo F, Seruga B, Niraula S, Pandiella A, Amir E. Influence of companion diagnostics on efficacy and safety of targeted anti-cancer drugs: systematic review and meta-analyses. *Oncotarget*. 2015; 6:39538–39549. <https://doi.org/10.18632/oncotarget.5946>.
214. Mansfield EA. FDA perspective on companion diagnostics: an evolving paradigm. *Clin Cancer Res*. 2014; 20:1453–1457.
215. De Souza JA, Wroblewski K, Proussaloglou E, Nicholson L, Hantel A, Wang Y. Validation of a financial toxicity (FT) grading system [abstract]. *J Clin Oncol*. 2017; 35:Abstr nr 6615.
216. Trosman JR, Weldon CB, Kelley RK, Phillips KA. Challenges of coverage policy development for next-generation tumor sequencing panels: experts and payers weigh in. *J Natl Compr Canc Netw*. 2015; 13:311–318.
217. Buchanan J, Wordsworth S, Schuh A. Issues surrounding the health economic evaluation of genomic technologies. *Pharmacogenomics*. 2013; 14:1833–1847.
218. Muir P, Li S, Lou S, Wang D, Spakowicz DJ, Salichos L, Zhang J, Weinstock GM, Isaacs F, Rozowsky J, Gerstein M. The real cost of sequencing: scaling computation to keep pace with data generation. *Genome Biol*. 2016; 17:53.
219. Neumann PJ, Cohen JT, Weinstein MC. Updating cost-effectiveness: The curious resilience of the \$50,000-per-QALY threshold. *N Engl J Med*. 2014; 371:796–797.
220. Phillips KA, Trosman JR, Kelley RK, Pletcher MJ, Douglas MP, Weldon CB. Genomic sequencing: assessing the health care system, policy, and big-data implications. *Health Aff*. 2014; 33:1246–1253.
221. Stern AD, Alexander BM, Chandra A. How economics can shape precision medicines. *Science*. 2017; 355:1131–1133.
222. Wooderchak-Donahue WL, O'Fallon B, Furtado LV, Durtschi JD, Plant P, Ridge PG, Rope AF, Yetman AT, Bayrak-Toydemir P. A direct comparison of next generation sequencing enrichment methods using an aortopathy gene panel- clinical diagnostics perspective. *BMC Med Genomics*. 2012; 5:50.
223. Xue Y, Ankala A, Wilcox WR, Hegde MR. Solving the molecular diagnostic testing conundrum for Mendelian disorders in the era of next-generation sequencing: Single-gene, gene panel, or exome/genome sequencing. *Genet Med*. 2015; 17:444–451.
224. LaDuca H, Farwell KD, Vuong H, Lu HM, Mu W, Shahmirzadi L, Tang S, Chen J, Bhide S, Chao EC. Exome sequencing covers >98% of mutations identified on targeted next generation sequencing panels. *PLoS One*. 2017; 12:e0170843.
225. Chang YS, Huang HD, Yeh KT, Chang JG. Evaluation of whole exome sequencing by targeted gene sequencing and Sanger sequencing. *Clin Chim Acta*. 2017; 471:222–232.
226. Van Allen EM, Robinson D, Morrissey C, Pritchard C, Imamovic A, Carter S, Rosenberg M, McKenna A, Wu YM, Cao X, Chinnaiyan A, Garraway L, Nelson PS. A comparative assessment of clinical whole exome and transcriptome profiling across sequencing centers: implications for precision cancer medicine. *Oncotarget*. 2016; 7:52888–52899. <https://doi.org/10.18632/oncotarget.9184>.
227. Lionel AC, Costain G, Monfared N, Walker S, Reuter MS, Hosseini SM, Thiruvahindrapuram B, Merico D, Jobling

- R, Nalpathamkalam T, Pellicchia G, Sung WWL, Wang Z, et al. Improved diagnostic yield compared with targeted gene sequencing panels suggests a role for whole-genome sequencing as a first-tier genetic test. *Genet Med*. 2017. <https://doi.org/10.1038/gim.2017.1119>.
228. Friedrich MJ. Going with the flow: The promise and challenge of liquid biopsies. *JAMA*. 2017; 318:1095–1097.
229. Husain H, Velculescu VE. Cancer DNA in the circulation: The liquid biopsy. *JAMA*. 2017; 318:1272–1274.
230. Oxnard GR, Paweletz CP, Sholl LM. Genomic analysis of plasma cell-free DNA in patients with cancer. *JAMA Oncol*. 2017; 3:740–741.
231. Kim J, Park WY, Kim NKD, Jang SJ, Chun SM, Sung CO, Choi J, Ko YH, Choi YL, Shim HS, Won JK, Molecular Pathology Study Group of Korean Society of Pathologists. Good laboratory standards for clinical next-generation sequencing cancer panel tests. *J Pathol Transl Med*. 2017; 51:191–204.
232. Hegde M, Santani A, Mao R, Ferreira-Gonzalez A, Weck KE, Voelkerding KV. Development and validation of clinical whole-exome and whole-genome sequencing for detection of germline variants in inherited disease. *Arch Pathol Lab Med*. 2017; 141:798–805.
233. Jennings LJ, Arcila ME, Corless C, Kamel-Reid S, Lubin IM, Pfeifer J, Temple-Smolkin RL, Voelkerding KV, Nikiforova MN. Guidelines for validation of next-generation sequencing-based oncology panels: A joint consensus recommendation of the Association for Molecular Pathology and College of American Pathologists. *J Mol Diagn*. 2017; 19:341–365.
